Belyaeva et al

1 **Cortical actin properties controlled by *Drosophila* Fos**  
2 **aid macrophage infiltration against surrounding tissue resistance**  
3 **Short title: Macrophage Cortical Actin counteracts Tissue Resistance**

4

5 **Vera Belyaeva<sup>§1,2</sup>, Stephanie Wachner<sup>§1</sup>, Igor Gridchyn<sup>†1</sup>, Markus Linder<sup>†3,4</sup>, Shamsi**  
6 **Emtenani<sup>1</sup>, Attila Gyoergy<sup>1</sup>, Maria Sibilica<sup>3</sup>, Daria Siekhaus<sup>1\*</sup>**

7

8 §: These authors contributed equally

9 †: These authors contributed equally

10

11 \*- Corresponding author, [daria.siekhaus@ist.ac.at](mailto:daria.siekhaus@ist.ac.at)

12 1 – Institute of Science and Technology Austria, Am Campus 1, 3400 Klosterneuburg,

13 Austria

14 2 – Current address: Molecular Devices, Urstein Süd 17, 5412, Austria

15 3 – Institute of Cancer Research, Department of Medicine 1, Comprehensive Cancer Center,

16 Medical University of Vienna, Austria

17 4 – Current address: F. Hoffmann - La Roche Ltd., Grenzacherstrasse 124, 4070 Basel,

18 Switzerland

Belyaeva et al

19 **ABSTRACT**

20 The infiltration of immune cells into tissues underlies the establishment of tissue resident  
21 macrophages, and responses to infections and tumors. Yet the mechanisms immune cells  
22 utilize to negotiate tissue barriers in living organisms are not well understood, and a role for  
23 cortical actin has not been examined. Here we find that the tissue invasion of *Drosophila*  
24 macrophages, also known as plasmatocytes or hemocytes, utilizes enhanced cortical F-actin  
25 levels stimulated by the *Drosophila* member of the fos proto oncogene transcription factor  
26 family (Dfos, Kayak). RNA sequencing analysis and live imaging show that Dfos enhances  
27 F-actin levels around the entire macrophage surface by increasing mRNA levels of the  
28 membrane spanning molecular scaffold tetraspanin TM4SF, and the actin cross-linking  
29 filamin Cheerio which are themselves required for invasion. Cortical F-actin levels are  
30 critical as expressing a dominant active form of Diaphanous, a actin polymerizing Formin,  
31 can rescue the *Dfos* Dominant Negative macrophage invasion defect. *In vivo* imaging shows  
32 that Dfos is required to enhance the efficiency of the initial phases of macrophage tissue  
33 entry. Genetic evidence argues that this Dfos-induced program in macrophages counteracts  
34 the constraint produced by the tension of surrounding tissues and buffers the mechanical  
35 properties of the macrophage nucleus from affecting tissue entry. We thus identify tuning  
36 the cortical actin cytoskeleton through Dfos as a key process allowing efficient forward  
37 movement of an immune cell into surrounding tissues.

38

39 **Introduction**

40 The classical model of cell migration on a surface postulated in the 1980's by  
41 Abercrombie has been extended (Danuser et al., 2013) by studies showing that migrating  
42 cells utilize diverse strategies depending on the architecture and physical properties of their  
43 three dimensional (3D) surroundings (Paluch et al., 2016). Much of this work has been

Belyaeva et al

44 conducted *in vitro*, where variations in the environment can be strictly controlled. However  
45 most 3D migration occurs within the body, and much less research has elucidated the  
46 mechanisms used to efficiently move in these diverse environments, particularly into and  
47 through tissues. Such migration is crucial for the influence of the immune system on health  
48 and disease. Vertebrate macrophages migrate into tissues during development where they  
49 take up residence, regulating organ formation and homeostasis and organizing tissue repair  
50 upon injury (Ginhoux and Guilliams, 2016; Theret et al 2019). A variety of types of immune  
51 cells infiltrate into tumors, and can both promote or impede cancer progression (Greten and  
52 Grivennikov 2019; Sharma and Allison, 2015). Responses to infection require immune cells  
53 to traverse through the vascular wall, into the lymph node, and through tissues (Luster et al.,  
54 2005). Yet the mechanisms utilized by immune cells to allow migration into such  
55 challenging cellular environments *in vivo* are not well understood.

56 Migration in 2-D and 3-D environments utilizes actin polymerization to power  
57 forward progress. The assembly of actin at the leading edge, when coupled to Integrin  
58 adhesion to anchor points in the surrounding ECM, can allow the front of the cell to progress  
59 (Mitchison and Cramer, 1996). This anchoring also allows the contraction of cortical actin  
60 at the rear plasma membrane to bring the body of the cell forwards. But a role for  
61 crosslinked actin at the cell surface in assisting forward progress by helping to counteract the  
62 resistance of surrounding tissues and in buffering nuclear properties has not been previously  
63 identified.

64 Our lab utilizes *Drosophila* macrophage migration into the embryonic germband (gb)  
65 to investigate mechanisms of immune cell tissue invasion. Macrophages, also called  
66 plasmatocytes or hemocytes, are the primary phagocytic cell in *Drosophila* and share  
67 striking similarities with vertebrate macrophages (Brückner et al., 2004; Evans & Wood,  
68 2011; Lemaitre & Hoffmann, 2007; Ratheesh et al., 2015; Weavers et al., 2016). They are

Belyaeva et al

69 specified in the head mesoderm at embryonic stages 4-6 and by stage 10 start spreading  
70 along predetermined routes guided by platelet-derived growth factor- and vascular  
71 endothelial growth factor-related factors (Pvf) 2 and 3 (Cho et al., 2002; Brückner et al.,  
72 2004; Wood et al., 2006) to populate the whole embryo. One of these paths, the movement  
73 into the gb, requires macrophages to invade confined between the ectoderm and mesoderm  
74 (Ratheesh et al., 2018; Siekhaus et al., 2010). The level of tension and thus apparent  
75 stiffness of the flanking ectoderm is a key parameter defining the efficiency of macrophage  
76 passage into and within the gb (Ratheesh et al., 2018). Penetration of macrophages into the  
77 gb utilizes Integrin, occurs normally without MMPs (Siekhaus et al., 2010) and is even  
78 enhanced by ECM deposition (Valoskova et al., 2019; Sánchez-Sánchez et al., 2017) likely  
79 because the basement membrane has not yet formed at this stage (Matsubayashi et al., 2017;  
80 Ratheesh et al., 2018). Thus *Drosophila* macrophage gb invasion represents an ideal system  
81 to explore the mechanisms by which immune cells and surrounding tissues interact with one  
82 another to aid the invasion process.

83 Here we sought to identify a transcription factor that could control immune cell tissue  
84 invasion and elucidate its downstream mechanisms. We identify a role for the *Drosophila*  
85 ortholog of the proto-oncogene Fos, in initial entry and migration within the tissue. We find  
86 Dfos increases cortical macrophage F-actin levels through the formin Cheerio and the novel  
87 target the tetraspanin TM4SF, aiding macrophages to move forward against the resistance of  
88 the surrounding tissues while buffering the mechanical properties of the nucleus.

## 89 **Results**

### 90 **The transcription factor Dfos is required for macrophage germband invasion**

91 To identify regulators of programs for invasion we searched the literature for  
92 transcription factors in macrophages prior to or during their invasion of germband tissues  
93 (gb) (Fig 1A-B'). Of the 12 such factors (S1 Table, based on Hammonds et al., 2013) we

Belyaeva et al

94 focused on Dfos, a member of the Fos proto-oncogene family, assigned by the Roundup  
95 algorithm as being closest to vertebrate c-fos (Deluca et al., 2012; Thurmond et al., 2019)  
96 (Fig 1C). Dfos contains the basic leucine zipper domain (bZIP) shown to mediate DNA  
97 binding and hetero and homo dimerization (Glover and Harrison, 1995; Szalóki et al., 2015)  
98 with the third leucine replaced by a methionine, a position also altered in the *C. elegans*  
99 ortholog FOS-1A (Sherwood et al., 2005). Embryo *in situ* hybridizations reveal enriched  
100 expression of the gene in macrophages at early stage 11 (Fig 1D, arrow) which is attenuated  
101 by stage 13. Dfos protein appears in the nucleus in a subset of the macrophages that are  
102 migrating towards the gb at stage 10-11 and in all macrophages by early stage 12 (Fig 1E-F'  
103 yellow arrowheads, G-G''' white arrows) persisting through stage 13 (S1A Fig). The *Dfos*<sup>1</sup>  
104 null mutant eliminates the macrophage signal, indicating antibody specificity (Fig 1H). To  
105 determine if Dfos affects invasion, we examined the 70% of embryos from *Dfos*<sup>1</sup> and the  
106 hypomorph *Dfos*<sup>2</sup> that did not display developmental defects at these early stages; we  
107 quantified macrophage numbers in the gb during a defined development period in early  
108 stage 12 (Fig 1M). Both Dfos mutants displayed significantly reduced numbers of  
109 macrophages in the gb compared to the control (Fig 1I-K, N) with normal numbers in the  
110 pre-gb zone for *Dfos*<sup>2</sup> (S1B Fig) (S1 Data). Macrophage-specific expression of *Dfos* rescues  
111 the *Dfos*<sup>2</sup> mutant (Fig 1L,N). Blocking Dfos function in macrophages with a dominant  
112 negative (DN) Dfos (Fig 1O-Q) that lacks the activation domain but retains the capacity to  
113 dimerize and bind DNA (Eresh et al., 1997) or two different RNAs against *Dfos* (Fig 1R)  
114 recapitulates the decrease in gb macrophages seen in the null while not affecting  
115 macrophage numbers in the whole embryo (S1C Fig), neighboring the germband (S1D Fig)  
116 and along the ventral nerve cord (vnc); (S1E-F Fig). These results argue that Dfos is  
117 required in macrophages for their migration into the gb. Since overexpressing DfosDN in  
118 the midgut does not inhibit a bZIP protein that acts there (Eresh et al., 1997) and

Belyaeva et al

119 overexpressing Dfos in macrophages does not change gb numbers (S1G Fig), Dfos and  
120 DfosDN do not appear to inhibit other bZIP proteins at higher levels of expression. As  
121 DfosDN should exert a quicker effect than RNAis, further experiments examining Dfos' role  
122 in enhancing germband invasion utilized mostly the DN form.

123 **Fig 1. The bZIP transcription factor Dfos acts in macrophages to facilitate their**  
124 **migration into the germband**

125 Schematics of lateral (A) stage (St) 11 and (A') early St 12 embryos. The boxed region  
126 magnified below indicates where macrophages (green) invade the germband (gb) after  
127 moving there from the head (B-B'). Macrophages sit on the yolk sac (yellow) next to the  
128 amnioserosa (black line) and then invade between the ectoderm (blue) and mesoderm  
129 (purple).

130 (C) Dfos protein aligned with its human orthologs c-Fos and FosB; orange outlines the  
131 bZIP region that has 48% identity to both proteins; identical amino acids shown in orange,  
132 conserved ones in green. Stars indicate Leucines in the zipper; ^ the third leucine which in  
133 Dfos is a methionine, a tolerated substitution (Garcia-Echeverria, 1997). The lower solid  
134 line indicates the basic domain and the dotted line the leucine zipper (ZIP).

135 (D) *In situ* hybridization of St 11 and 13 embryos with a riboprobe for Dfos-RB  
136 (Fbcl0282531) which also detects all Dfos isoforms. *Dfos* RNA expression is enriched in  
137 macrophages (arrow) and the amnioserosa (arrowhead) before gb invasion, but is gone  
138 thereafter.

139 (E-H') Confocal images of the boxed region in A from fixed embryos expressing *GFP* in  
140 macrophages (green) stained with a Dfos Ab (red). (E-F', H-H') A white dashed line  
141 indicates the gb edge. (E-F) The Dfos Ab (yellow arrowheads) stains (E) a subset of the  
142 macrophages moving towards the gb at St 11, and (F) all macrophages by early St 12, as  
143 well as the amnioserosa (white arrowheads). (G) Higher magnification shows Dfos  
144 colocalizing with the nuclear marker DAPI (white). (H) No staining is detected in  
145 macrophages or the amnioserosa in the null *Dfos*<sup>1</sup> mutant.

146 (I-L) Lateral views of mid St 12 embryos from (I) the control, (J) the null allele *Dfos*<sup>1</sup>, (K)  
147 the hypomorphic allele *Dfos*<sup>2</sup>, and (L) *Dfos*<sup>2</sup> with *Dfos* re-expressed in macrophages.

Belyaeva et al

148 **(M)** Schematic of St 12 embryo, gb region indicated by a black oval outline. **(N)**  
149 Quantitation reveals that both *Dfos* alleles display fewer macrophages in the gb. Re-  
150 expression of *Dfos* in macrophages in the *Dfos*<sup>2</sup> hypomorph significantly rescues the defect.  
151 Control vs. *Dfos*<sup>1</sup> p=0.02 (30% reduction), Control vs. *Dfos*<sup>2</sup> p=0.017 (25% reduction),  
152 Control vs. *Dfos*<sup>2</sup>; *mac>Dfos* p=0.334.

153 **(O-P)** Lateral views of mid St 12 embryos from **(O)** the control, or **(P)** a line expressing a  
154 dominant negative (DN) form of *Dfos* in macrophages. **(Q)** Quantification of macrophage  
155 numbers in the gb (see schematic) in the two genotypes visualized in **O, P**. p<0.0001(\*\*\*\*)  
156 (41% reduction).

157 **(R)** Quantification of macrophage numbers in the gb of the control and two different lines  
158 expressing RNAi constructs against *Dfos* in macrophages. Control vs. *Dfos RNAi*<sup>1</sup> (TRiP  
159 HMS00254) p=0.001 (32% reduction), Control vs. *Dfos RNAi*<sup>2</sup> (TRiP JF02804) p=0.02 (21%  
160 reduction). The data in **Q** and **R** argue that *Dfos* is required within macrophages to promote  
161 gb tissue invasion.

162 Embryos are positioned with anterior to left and dorsal up in all images and histograms show  
163 mean + standard error of the mean (SEM) throughout. Macrophages are labeled using *srp-*  
164 *Gal4* (“*mac>*”) driving *UAS-GFP* in **E-H**, *UAS-GFP::nls* in **I-L** and *srpHemo-*  
165 *H2A::3xmCherry* in **O-P**. \*\*\*p<0.005, \*\*p<0.01, \*p<0.05. One-way ANOVA with Tukey  
166 post hoc was used for **N** and **R**, and unpaired t-test for **Q**. The embryo number analysed is  
167 indicated within the relevant column in the graphs. Scale bar: 50 μm in **D**, 5 μm in **E-H** and  
168 10 μm in **I-L, O-P**.

### 169 ***Dfos* promotes macrophage motility and persistence during tissue entry**

170 To examine the dynamic effects of *Dfos* on tissue invasion, we performed live imaging and  
171 tracking of macrophages. We visualized macrophages with *srpHemo-H2A::3xmCherry*  
172 (Gyoergy et al., 2018) in either a wild type or *mac>DfosDN* background, capturing the  
173 initial stage of invasion (S1 Movie). The speed of macrophages moving in the area  
174 neighboring the germband prior to invasion was not significantly changed (pre-gb, Fig  
175 2B,C). However, the first *mac>DfosDN* macrophage to enter is delayed by 20 min in  
176 crossing into the gb (Fig 2D). *mac>DfosDN* macrophages also displayed reduced speed and  
177 directional persistence during entering as well as while moving along the first 20μm of the

Belyaeva et al

178 ectoderm-mesoderm interface (gb entry, Fig 2E, S2A Fig). Macrophages in the *Dfos*<sup>2</sup> mutant  
179 largely mirrored this phenotype, but displayed slower movement in the pre-gb zone  
180 neighboring the amnioserosa in which *Dfos* is also expressed (Fig 1D-F), likely causing a  
181 non-autonomous effect (S2B-C Fig, S2 Movie) (Fig 1D, black arrowhead, E-F, white  
182 arrowheads). Macrophages expressing *Dfos*DN moved with unaltered average speed as they  
183 spread out along the non-invasive route of the *vnc* (Fig 2F, Fig 2G, S3 Movie), albeit with  
184 reduced directional persistence (S2A Fig). We thus conclude from live imaging that *Dfos* in  
185 macrophages aids their initial invasive migration into the gb, increases their speed within the  
186 gb and does not underlie their progress along the *vnc*.

187 **Fig 2. *Dfos* facilitates the initial invasion of macrophages into the gb tissue**

188 (A) Movie stills of control embryos and those expressing *Dfos*DN in macrophages (green,  
189 labelled using *srpHemo-H2A::3xmCherry*). Area imaged corresponds to the black dashed  
190 square in the schematic above. The germband (gb) border is outlined with a white dashed  
191 line. The first entering macrophage is indicated with a white arrowhead, and time in minutes  
192 in the upper right corner.

193 (B) Detailed schematic showing the different zones for which the parameters of macrophage  
194 gb invasion were quantified. The pre-gb area is shown in yellow, the gb entry zone is outlined  
195 in a solid line.

196 (C) Macrophage speed in the pre-gb area was not significantly changed in macrophages  
197 expressing *Dfos*DN (3.00  $\mu\text{m}/\text{min}$ ) compared to the control (3.61  $\mu\text{m}/\text{min}$ ),  $p=0.58$ .

198 (D) Quantification shows a 68% increase in the total gb crossing time of *Dfos*DN expressing  
199 macrophages compared to the control. Total gb crossing time runs from when macrophages  
200 have migrated onto the outer edge of the gb ectoderm, aligning in a half arch, until the first  
201 macrophage has translocated its nucleus into the gb ecto-meso interface.  $p=0.008$ .

202 (E) *Dfos*DN expressing macrophages displayed a significantly reduced speed (1.53  $\mu\text{m}/\text{min}$ )  
203 at the gb entry zone compared to the control (1.98  $\mu\text{m}/\text{min}$ ),  $p=1.11e^{-06}$ .

204 (F) Macrophages expressing *Dfos*DN in a Stage 13 embryo move with unaltered speed along  
205 the *vnc* in the region outlined by the dashed black box in the schematic above (4.93



Belyaeva et al

206  $\mu\text{m}/\text{min}$ ), compared to the control ( $4.55 \mu\text{m}/\text{min}$ ),  $p=0.64$ . Corresponding stills shown in (G)  
207 Macrophages are labeled by *srpHemo-Gal4* driving *UAS-GFP::nls*.  
208 \*\*\* $p<0.005$ , \*\* $p<0.01$ , \* $p<0.05$ . Unpaired t-test used for C-F, a Kolmogorov-Smirnov test  
209 for D. For each genotype, the number of tracks analysed in C and F, and the number of  
210 macrophages in D-E are indicated within the graph columns. Tracks were obtained from  
211 movies of 7 control and 7 *mac>DfosDN* expressing embryos in panel D, 3 each in C, F, and  
212 4 each in E. Scale bar:  $10 \mu\text{m}$ .

### Dfos modulates Filamin and Tetraspanin to aid gb tissue invasion

213 To identify Dfos targets that promote macrophage invasion, we FACS isolated  
214 macrophages from wild type and *mac>DfosDN* embryos during the time when invasion has  
215 just begun, and conducted RNA-sequencing of the corresponding transcriptomes (Fig 3A, S1  
216 Data). We first assessed reads that map to Dfos, which can correspond to both endogenous  
217 and DfosDN mRNA; we found a 1.6 fold increase in the presence of the one copy of DfosDN  
218 in this line, arguing that this transgene is expressed at levels similar to each endogenous copy  
219 of Dfos and is unlikely to produce extraneous effects (S2 Data). We then examined genes that  
220 in the presence of DfosDN displayed a log<sub>2</sub> fold change of at least 1.5 with an adjusted P  
221 value less than 0.05. 10 genes were down-regulated (Fig 3B, S3A-B Fig) and 9 up-regulated  
222 by DfosDN (S2 Table). Upregulated genes in DfosDN encoded mostly stress response  
223 proteins, so we concentrated on the downregulated class. Of these, we focused on the actin  
224 crosslinking filamin Cherio (Cher) and the tetraspanin TM4SF from a group that can form  
225 membrane microdomains that affect signalling and migration (Razinia et al., 2012; Yeung et  
226 al., 2018). No known role for TM4SF had been previously identified in *Drosophila*. To  
227 determine if these Dfos targets were themselves required for invasion, we RNAi knocked  
228 down Cher and TM4SF through RNAi individually or simultaneously and observed  
229 significantly reduced macrophage numbers in the gb, particularly upon the knockdown of  
230 both targets simultaneously (Fig 3C-G) while not affecting macrophage numbers in the pre-  
231 gb zone (S3D Fig) or on the vnc (S3E Fig). Over-expression of Cher or TM4SF along with

Belyaeva et al

232 *DfosDN* in macrophages increased the mean macrophage numbers in the gb, and over-  
233 expression of TM4SF rescued the *DfosDN* macrophage invasion defect (Fig 3H-L).  
234 Expression of a GFP control did not restore macrophage invasion indicating that the rescue  
235 we observed through Cher or TM4SF expression was not due to promoter competition  
236 leading to reductions in *DfosDN* expression. We conclude that *Dfos* aids macrophage gb  
237 invasion by increasing the mRNA levels of the filamin actin crosslinker Cher and the  
238 tetraspanin TM4SF.

239 **Fig 3. *Dfos* regulates macrophage germband invasion through cytoskeletal regulators**  
240 **the Filamin Cherio and the tetraspanin TM4SF**

241 (A) Schematic representing the pipeline for analyzing mRNA levels in FACS sorted  
242 macrophages.

243 (B) Table of genes down-regulated in macrophages expressing *DfosDN*. Genes are ordered  
244 according to the normalized p-value from the RNA-Sequencing. The closest mouse protein  
245 orthologs were found using UniProt BLAST; the hit with the top score is shown in the table.

246 (C-F) Lateral views of representative St 12 embryos in which the two targets with links to  
247 actin organization, (D) the Tetraspanin TM4SF and (E) the Filamin Cherio, have been  
248 knocked down individually or (F) together, along with the control (C). Scale bar: 50  $\mu$ m.

249 (G) Quantification shows that the number of macrophages in the germband is reduced in  
250 embryos expressing RNAi against either *cher* (*KK 107451*) or *TM4SF* (*KK 102206*) in  
251 macrophages, and even more strongly affected in the double RNAi of both. Control vs. *cher*  
252 RNAi p=0.0005 (46% reduction). Control vs. *TM4SF* RNAi p=0.009 (37% reduction), Control  
253 vs. *cher/TM4SF* RNAi p>0.0001 (61% reduction). *cher* RNAi vs. *TM4SF* RNAi p=0.15.

254 (H-K) Lateral views of a representative St 12 embryo from (H) the control, as well as  
255 embryos expressing *DfosDN* in macrophages along with either (I) GFP, (J) Cher, or (K)  
256 TM4SF.

257 (L) Quantification shows that over-expression of TM4SF in *DfosDN* expressing  
258 macrophages restores their normal numbers in the gb. Over-expression of Cher in this  
259 background shows a strong trend towards rescue, but did not reach statistical significance.  
260 Control vs. *DfosDN* p=0.015 (28% reduction); Control vs. *cher* p=0.74; Control vs. *TM4SF*

Belyaeva et al

261  $p > 0.99$ ; *DfosDN* vs. *DfosDN cher*  $p = 0.14$ ; *DfosDN* vs. *DfosDN, TM4SF*  $p < 0.0001$ ; Control  
262 vs. *cher*  $p = 0.97$ ; Control vs. *TM4SF*  $p = 0.35$ .

263 **(M-O)** q-PCR analysis of mRNA extracted from the bones of mice that are wild type,  
264 transgenic (tg) for *Fos* controlled by a Major Histocompatibility promoter and viral 3'UTR  
265 elements, and those in which such c-Fos transgenesis has led to an osteosarcoma (OS).  
266 Analysis of mRNA expression shows that higher levels of **(M)** *Fos* correlate with higher  
267 levels of **(N-N')** *FlnA-C*, and **(O)** *Tspan6* in osteosarcomas.  $p$  values = 0.86, 0.001, 0.003 in  
268 **M**, 0.98, 0.009, 0.007 in **N**, 0.39,  $< 0.0001$ ,  $< 0.0001$  in **N'**, 0.76, 0.005, 0.002 in **N''**, 0.99,  
269 0.004, 0.003 in **O**. Scale bar: 50  $\mu\text{m}$ .

270 Macrophages are labeled using either **(C-F)** *srp::H2A::3xmCherry* or **(H-K)** *srpHemo-Gal4*  
271 ("mac>") driving *UAS-mCherry::nls*. \*\*\* $p < 0.005$ , \*\* $p < 0.01$ , \* $p < 0.05$ . Unpaired t-test or  
272 one-way ANOVA with Tukey post hoc were used for statistics. Each column contains the  
273 number of analyzed embryos.

## 274 **In murine osteosarcoma c-fos mRNA level increases correlate with those of Filamins** 275 **and Tetraspanin-6**

276 To determine if these *Dfos* targets in *Drosophila* could also be *Fos* targets in vertebrate  
277 cells, we utilized a well-established murine transgenic model that over expresses c-fos. In  
278 these mice transgenic c-fos expression from viral 3' UTR elements in osteoblasts (the bone  
279 forming cells) leads to osteosarcoma development accompanied by a 5 fold increase in c-fos  
280 mRNA expression (Fig 3M) (Linder et al., 2018). We examined by qPCR the mRNA levels  
281 of our identified *Dfos* targets' orthologs, comparing their levels in osteosarcomas (*Fos* tg  
282 OS) to neighboring, osteoblast-containing healthy bones from *Fos* tg mice (*Fos* tg bone) and  
283 control bones from wild-type mice (wt bone). We saw 2.5 to 8 fold higher mRNA levels of  
284 the three murine Filamin orthologs (Fig 3N-N') and a 15 fold increase in Tetraspanin-6 (Fig  
285 3O) in osteosarcoma cells. mRNA levels of several of the orthologs of other *Dfos* targets we  
286 had identified showed less strong inductions or even decreases; the Glutathione S transferase  
287 *Gstt3* and the Slit receptor *Eva1c* increased 4 and 2.8 fold respectively, while the  
288 mitochondrial translocator *Tspo* was 25% lower (S3F-I Fig). These results suggest that

Belyaeva et al

289 Dfos's ability to increase mRNA levels of two key functional targets for migration, a  
290 Filamin and a Tetraspanin, is maintained by at least one vertebrate fos family member.

291

292 **Dfos increases cortical actin polymerization through Cheerio and TM4SF to aid**  
293 **macrophage invasion**

294 We wished to determine what cellular properties Dfos could affect through such targets to  
295 facilitate *Drosophila* macrophage invasion. Given Cheerio's known role as an actin  
296 crosslinker, we examined actin in invading *mac>DfosDN* macrophages within live embryos.

297 To visualize actin in macrophages, we utilized a *srpHemo-moe::3xmCherry* reporter which  
298 marks cortical F-actin (Edwards et al., 1997; Franck et al., 1993) and observed a reduction of  
299 53% (Fig 4A-D) in invading *mac>DfosDN* macrophages. We hypothesized that these

300 changes in actin all around the cell edge could be due to the lower levels of Cheerio and/or

301 TM4SF mRNA in the *mac>DfosDN* macrophages. Indeed, we observed reductions in  
302 *moe::3xmCherry* all around the edge of invading macrophages in live embryos expressing

303 RNAi against Cher or TM4SF in macrophages, (Fig 4E-H). To test if a decrease in actin

304 assembly could underlie the reduced tissue invasion of *mac>DfosDN* macrophages, we

305 forced cortical actin polymerization by expressing a constitutively active version of the

306 formin Diaphanous (Dia-CA) which localizes to the cortex (Gonzalez-Gaitan and Peifer,

307 2009). Indeed, Dia-CA completely rescued the *DfosDN* invasion defect (Fig 4I-J). Given that

308 Dia, like Dfos, does not affect general macrophage migratory capacities along the ventral

309 nerve cord (Davis et al., 2015), we examined if Dia might normally play a role in invasion.

310 We utilized two RNAis against Dia and observed decreased macrophage numbers in the gb in

311 each (Fig 4K-L) with no effect on numbers in the pre-gb (S4A Fig) or on the vnc (S4B Fig).

312 These results argue that Dfos aids invasion by increasing levels of TM4SF and Cheerio to

Belyaeva et al

313 enhance actin polymerization around the surface of the macrophage, potentially by increasing  
314 the activity of Dia.

315 **Fig 4. Dfos regulates the actin cytoskeleton through Cher, TM4SF, and the formin Diaphanous**

316 (A) Quantification of phalloidin intensity to detect F actin at the macrophage-macrophage contacts in  
317 Stage 11/12 *Dfos*<sup>1</sup> embryos. F-actin is strongly reduced at these homotypic contacts.

318 (B-C, F-H) Representative confocal images of live embryos expressing in invading macrophages the  
319 F-actin binding and homodimerizing portion of Moesin (*srpHemo-moe::3xmCherry*) to label F-actin.  
320 Relative Moe-3xmCherry intensity is indicated with a pseudo-color heat map as indicated on the left,  
321 with yellow as the highest levels and dark blue as the lowest.

322 (D-E) Quantification of the macrophage Moe:3xmCherry intensity as a measure of cortical F-actin,  
323 normalized to the average fluorescence intensity of the control per batch.

324 (D) Quantification shows that macrophages expressing DfosDN display a 53% reduction in  
325 Moe::3xmCherry intensity compared to the control when the two outliers shown as single dots are  
326 excluded, 37% if they are included. Outliers identified by 10% ROUT. n of ROIs analysed = 650 for  
327 control, 687 for *DfosDN*. p=0.0007 for analysis including outliers (Kolmogorov-Smirnov) and  
328 p<0.0001 for analysis excluding outliers (Welch's t-test).

329 (E) Quantification reveals that macrophage expression of an RNAi against either *cher* or *TM4SF*, the  
330 two genes whose expression is reduced in *DfosDN*, also results in a decrease of Moe::3xmCherry  
331 intensity (by 40% each). n of ROIs analysed = 549 for control, 423 for *cher RNAi*, 306 for *TM4SF*  
332 *RNAi*. Control vs. *cher RNAi* p=0.006. Control vs. *TM4SF* p=0.003.

333 (I,I') Representative confocal images of St 12 embryos from the control and a line in which  
334 macrophages express DfosDN and a constitutively active (CA) form of the formin Dia to restore  
335 cortical actin polymerization.

336 (J) Quantification shows that while macrophage expression of DiaCA does not significantly affect the  
337 number of macrophages in the gb, expressing it in a DfosDN background rescues that lines'  
338 macrophages gb invasion. Control vs. *DfosDN* p=0.017 (28% reduction), Control vs. *diaCA* p=0.18,  
339 Control vs. *DfosDN, diaCA* p=0.010, *DfosDN* vs. *DfosDN, diaCA* p<0.0001

340 (K,K') Representative confocal images of St 12 embryos from the control and from a line expressing  
341 an RNAi against *dia* in macrophages.

342 (L) Quantification of two RNAi lines against *dia* expressed in macrophages shows a 37% and 21%  
343 reduction in macrophage numbers in the gb compared to control. Control vs. *dia RNAi*<sup>1</sup> (TRiP  
344 HMS05027) p<0.0001; control vs. *dia RNAi*<sup>2</sup> (TRiP HMS00308) p=0.0008.

Belyaeva et al

345 Macrophages are labeled using either *srpHemo-Gal4* driving *UAS-mCherry::nls* (**I-I'**), or *srpHemo-*  
346 *H2A::3xmCherry* (**K-K'**). *srpHemo-moe::3xmCherry*, *srpHemo-Gal4* crossed to (**B**) *UAS-GFP* as a  
347 Control, (**C**) *UAS-DfosDN*, (**F**) w<sup>-</sup> Control, (**G**) *UAS-cher RNAi* (KK 107451), or (**H**) *UAS-TM4SF*  
348 *RNAi* (KK 102206). \*\*\*p<0.005, \*\*p<0.01, \*p<0.05. Unpaired t-test used for **A**, one way ANOVA  
349 with Tukey post hoc for **E, J, L** and Welch's t test of normalized average mean intensity per embryo  
350 for **D** with the two indicated outliers excluded, for statistical assessment. The number of analyzed (**A**)  
351 macrophage-macrophage junctions, or (**D-E, J, L**) embryos is shown in each column. Scale bar 10  $\mu\text{m}$   
352 in (**B-C, F-H**), 50  $\mu\text{m}$  in (**I, K**).

353 We examined what consequence these lower cortical F-actin levels had on the cellular  
354 behavior of macrophages during entry. Quantitation showed that the actin protrusion that  
355 macrophages initially insert between the ectoderm and mesoderm during invasion was  
356 actually longer in the *mac>DfosDN>LifeAct::GFP* macrophages than in the control (Fig 5A,  
357 S5A Fig, S4 Movie). We then performed live imaging of macrophages labeled with  
358 CLIP::GFP to visualize microtubules and thus cell outlines in both genotypes; we determined  
359 the aspect ratio (maximal length over width) that the first entering cell displays as it enters  
360 into the gb. The first *DfosDN*-expressing macrophage was extended even before it had fully  
361 moved its rear into the gb (S5B Fig). We carried out measurements, taking only cells that had  
362 entered the gb to be able to clearly distinguish the rear of the macrophage from following  
363 cells (Fig 5B). We also avoided including in this measurement the forward protrusion and  
364 determined that the first macrophage inside the gb displays an average increase of 23% in the  
365 maximal length (L) of the cell body and a 12% reduction in the maximal width (W) (S5 Fig).  
366 Interestingly, in the pre-gb zone the aspect ratio (max L/W) of *mac>DfosDN* macrophages  
367 was not different from control macrophages (Fig 5C-D) although the *mac>DfosDN* cells  
368 were 9% smaller in both their length and width (S5D Fig). This suggested that the gb could  
369 impose resistance on the entering macrophage, an effect which *mac>DfosDN* macrophages  
370 have trouble overcoming due to their compromised actin cytoskeleton at the cortex.

Belyaeva et al

371 **Fig 5. Dfos aids macrophage gb invasion against the resistance of surrounding tissues and**  
372 **buffers the nucleus**

373 (A) Quantification from live embryos shows that the length of the F-actin protrusion of the first  
374 entering macrophage is longer in macrophages expressing DfosDN.  $p=0.011$ . The F-actin protrusion  
375 labelled with *srpHemo-Gal4* driving *UAS-LifeAct::GFP* was measured in the direction of forward  
376 migration (see schematic).

377 (B-C) Stills from 2-photon movies of St 11 embryos showing (B) the first macrophages entering the  
378 gb and (C) macrophages in the pre-gb zone in the control and in a line expressing DfosDN in  
379 macrophages. Microtubules are labelled with *srpHemo-Gal4* driving *UAS-CLIP::GFP*. A blue arrow  
380 indicates the front and a yellow arrow indicates the rear of the macrophage. Schematics above  
381 indicate where images were acquired

382 (D) Schematic at left shows macrophage measurements: vertical line for the maximum length and  
383 horizontal line for the maximum width. Histograms show the probability density distributions of the  
384 aspect ratios (maximum length over maximum width) of the first macrophage entering the gb (left)  
385 and macrophages in the pre-gb (right). Macrophages expressing *DfosDN* are more elongated the  
386 *mac>DfosDN* line. Control vs. *DfosDN* aspect ratios at gb entry  $p=0.0004$ , in pre-gb  $p=0.39$ .

387 Confocal images of St 12 embryos expressing RNAi against Lamin or LaminC in macrophages in (E-  
388 E'') the control, or (F-F'') in embryos also expressing DfosDN in macrophages. *srpHemo-GAL4*  
389 used as drover. *Lam RNAi<sup>1</sup>*: GD45636; *RNAi<sup>2</sup>*KK107419. *Lam C RNAi*: TRiP JF01406

390 (G) Macrophage RNAi knockdown of Lamins which can increase nuclear deformability did not  
391 affect macrophages numbers in the gb in the control. In embryos in which macrophages expressed  
392 DfosDN, Lamin knockdown rescues their reduced numbers in the gb. Control vs. *DfosDN*  $p<0.0001$ .  
393 Control vs. *Lam RNAi<sup>1</sup>*  $p>0.99$ , vs. *Lam RNAi<sup>2</sup>*  $p=0.83$ , vs. *LamC RNAi*  $p>0.99$ . Control vs. *DfosDN*,  
394 *Lam RNAi<sup>1</sup>*  $p=0.024$ , vs. *DfosDN*, *Lam RNAi<sup>2</sup>*  $p>0.99$ , vs. *DfosDN*, *LamC RNAi*  $p>0.99$ . *DfosDN* vs.  
395 *DfosDN*, *Lam RNAi<sup>1</sup>*  $p<0.0001$ , vs. *DfosDN*, *Lam RNAi<sup>2</sup>*  $p=0.0049$ , vs. *DfosDN*, *LamC RNAi*  
396  $p<0.0001$ .

397

398 (H) Expressing *DfosDN* in macrophages reduces their number in the gb. Concomitantly reducing  
399 tissue tension in the ectoderm (light blue in schematic) through Rho1DN substantially rescues  
400 invasion. *srpHemo-QF QUAS* control (*mac<>*) governed macrophage expression and *e22C-GAL4*  
401 ectodermal (*ecto>*). Control vs. *mac<>DfosDN*  $p<0.0001$  (56% reduction), vs. *mac<>DfosDN*;  
402 *ecto>Rho1DN*  $p>0.99$ , vs. *ecto>Rho1DN*  $p=0.11$ . *mac<>DfosDN* vs. *mac<>DfosDN; ecto>Rho1DN*  
403  $p<0.0001$ , vs. *ecto>Rho1DN*  $p=0.0044$ . *mac<>DfosDN; ecto>Rho1DN* vs. *ecto>Rho1DN*  $p>0.99$ .

404

Belyaeva et al

405 Macrophages are labeled in **B-C** by *srp-Gal4* driving *UAS-CLIP::GFP*, and in **E-F** by *srpHemo-*  
406 *Gal4 UAS-mCherry-nls*. \*\*\* $p < 0.005$ , \*\* $p < 0.01$ , \* $p < 0.05$ . Unpaired t-test was used for **A**, one way  
407 ANOVA with Tukey post hoc for **G, H**. The number shown within the column corresponds to  
408 measurements in **A**, and analysed embryos in **G, H**. Scale bar 5 $\mu$ m in **B-C**, and 50 $\mu$ m in **E-F**.

409

410 **Dfos promotes advancement of macrophages against the resistance of the surrounding**  
411 **tissues and buffers the nucleus**

412 We therefore examined how the properties of the gb tissues and macrophages interact during  
413 invasion. We first investigated if the macrophage nucleus impedes normal invasion by  
414 varying levels of the two *Drosophila* Lamin genes, Lam and LamC, both equally related to  
415 the vertebrate lamins A and B1 (Muñoz-Alarcón et al., 2007) and both shown to affect  
416 nuclear stiffness and deformability (Wintner et al., 2020; Zwerger et al., 2013). Over-  
417 expressing Lam (S5E Fig) or knocking down either of these Lamins in macrophages  
418 through RNAi (Perkins et al., 2015) did not change macrophage numbers in the gb of wild  
419 type embryos (Fig 5E-E', G), suggesting that the stiffness of the macrophage nucleus is  
420 not a rate limiting parameter during normal tissue invasion into the narrow path between the  
421 ectoderm and mesoderm, This result also argues that Lamins' capacity to alter gene  
422 expression is not normally important for invasion (Andrés & González, 2009). However in  
423 *mac>DfosDN* macrophages, knockdown of these Lamins was able to rescue the gb invasion  
424 defect (Fig 5E-G), supporting the conclusion that the properties of the nucleus affect  
425 invasion in the absence of the higher levels of cortical actin Dfos normally induces. To  
426 directly test if reducing the tension of surrounding tissues can counteract the absence of  
427 Dfos, we expressed Rho1DN in the ectoderm with the *e22C-GAL4* driver while expressing  
428 *QUAS-DfosDN* in macrophages with the GAL4-independent Q-system driver we had  
429 constructed, *srpHemo-QF2* (Gyoergy et al., 2018). Rho1 through ROCK is a key regulator  
430 of Myosin activity, epithelial tension and tissue stiffness (Warner & Longmore, 2009; Zhou  
431 et al., 2009); Myosin II is essential for actin contractility (Heer & Martin, 2017) and tension



Belyaeva et al

432 in the *Drosophila* gb ectoderm (Ratheesh et al., 2018). Indeed, we found that this reduction  
433 of ectodermal tension substantially rescued DfosDN expressing macrophage numbers in the  
434 gb (Fig 5H). Taken together our results argue that Dfos aids *Drosophila* macrophages in  
435 withstanding the resisting force of surrounding cells against the nucleus during invasion into  
436 tissues.

437

#### 438 **Discussion:**

439 We identify the ability to tune the state of the cortical actin cytoskeleton as a key  
440 capacity for immune cells migrating into and within tissue barriers *in vivo*. We find that  
441 macrophages upregulate a program governed by the transcription factor Dfos to enable this.  
442 Dfos in *Drosophila* is known to regulate the movement during dorsal or wound closure of  
443 epithelial sheets (Brock et al., 2012; Lesch et al., 2010; Riesgo-Escovar & Hafen, 1997;  
444 Zeitlinger et al., 1997) as well as the development of epithelial tumors and their  
445 dissemination (Külshammer et al., 2015; Uhlirva & Bohmann, 2006; Külshammer &  
446 Uhlirva, 2013; Benhra et al., 2018). Here we define a different role, namely that Dfos  
447 enables a stream of individual immune cells to efficiently push their way into tissues, a  
448 process which is aided rather than hampered by the presence of the ECM (Sánchez-Sánchez  
449 et al., 2017; Valoskova et al., 2019). This function appears specifically required for invasion  
450 as we observe no defects in *DfosDN* macrophages' migratory speed in open environments.  
451 *DfosDN* macrophages display decreased actin at the cell edge and an elongated shape within  
452 the germband, suggesting a defect in the stiffness of the cortex. Indeed, only in the presence  
453 of *DfosDN* does the state of the nucleus become relevant, with reductions in Lamins shown  
454 to underlie nuclear stiffness (Wintner et al., 2020) enhancing the ability of macrophages to  
455 invade. These findings along with the ability of a softened ectoderm to substantially rescue  
456 the *DfosDN* macrophages' germband invasion defect lead us to propose the model (Fig 6)

Belyaeva et al

457 that Dfos permits efficient initial translocation of the macrophage body under ectodermal  
458 reactive load by forming a stiff cortical actin shell that counteracts surrounding tissue  
459 resistance and protects the nucleus from undergoing high levels of mechanical stress during  
460 its deformation.

461 **Fig. 6. Model: Dfos increases actin assembly and crosslinking through the tetraspanin TM4SF**  
462 **and the Filamin Cheerio to counter surrounding tissue resistance**

463 We propose a model for how Dfos tunes the cortical actin properties of *Drosophila* embryonic  
464 macrophages to aid their infiltration against the resistance of the surrounding germband tissue. Dfos  
465 leads to an increase of the tetraspanin TM4SF and the Filamin Cheerio (Cher). The binding of TM4SF  
466 and Filamin to different partners (see Figure S6) forms a network at the cell surface of Integrin, actin  
467 and upstream signaling molecules; this results in the recruitment of Rho GEFs and activation of Rho  
468 GTPases and the formin Diaphanous, which can stimulate further actin polymerization. Thereby, F-  
469 actin is assembled into a more crosslinked and dense network aiding the macrophage in moving its  
470 cell body into the ecto-meso interface. The presence of Lamin around the nuclear membrane does not  
471 affect this process in the wildtype. However, in the DfosDN-expressing macrophages, the loss of Cher  
472 and TM4SF lead to reduced cross-linked actin levels at the cell cortex making the stiffness of the  
473 nucleus the rate limiting step for macrophage infiltration of the gb tissue.

474 **A molecular program for tissue invasion that strengthens cortical actin**

475 Crucial mediators of this process are two actin regulators, the filamin Cher, known to  
476 be a Dfos target in epithelia, and the previously uncharacterized membrane scaffold  
477 tetraspanin TM4SF. We show that both require Dfos for higher mRNA levels in  
478 macrophages and present correlative evidence that these classes of genes are also  
479 upregulated by vertebrate c-fos. Each of these Dfos targets is required for macrophage  
480 invasion; over-expression of TM4SF in macrophages can rescue the *DfosDN* tissue invasion  
481 phenotype. We propose that these targets act together to tune the actin cytoskeleton for  
482 tissue invasion. Higher Filamin levels cross-link actin filaments into resilient and stiffer  
483 networks maintaining cell integrity during mechanical stress (Goldmann et al., 1997; Tseng  
484 et al., 2004; Fujita et al., 2012). This aids the distribution of forces from focal adhesions

Belyaeva et al

485 across the entire migrating cell body, since Filamins can bind directly to Integrin, and even  
486 more strongly under strain (Ehrlicher et al., 2011; Glogauer et al., 1998; Kumar et al., 2019;  
487 Razinia et al., 2012). Tetraspanins, self-associating multipass transmembrane proteins, also  
488 can bind Integrin, forming microdomains of adhesion molecules, receptors and their  
489 intracellular signaling complexes, including Rho GTPases (Zimmerman, et al., 2016;  
490 Termini & Gillette, 2017; Yáñez-Mó et al., 2009; Berditchevski & Odintsova, 1999).  
491 Filamins similarly bind receptors, regulators of actin assembly, Rho GTPases and the Rho  
492 GEF Trio (Popowicz et al., 2006; Stossel et al., 2001; Vadlamudi et al., 2002; Ohta et al.,  
493 1999; Bellanger et al., 2000). Given that we observe reduced macrophage cortical F-actin in  
494 the absence of either the Filamin Cheerio or the Tetraspanin TM4SF we propose that these  
495 targets enhance the recruitment and activation of Rho GTPases and the formin Dia to  
496 stimulate actin polymerization (Fig 6, S6 Fig) (Rousso et al., 2013; Seth et al., 2006;  
497 Großhans et al., 2005; Williams et al., 2007; Delaguillaumie et al., 2002). Dfos'  
498 upregulation of both targets could thus lead to a supra-network in which ECM-anchored FAs  
499 connect to a strong cross-linked cortical actin lattice, allowing Myosin contraction to be  
500 converted into cellular advancement despite resistance from the flanking ectoderm.

501 We demonstrate that the actin nucleating formin Dia is important for *Drosophila*  
502 macrophage invasion and capable of rescuing the defects in the *DfosDN* mutant. Unlike the  
503 formin Ena which mediates chemotaxis (Davidson et al., 2019), Dia is not required for  
504 general *Drosophila* macrophage migration, and instead allows macrophages to recoil away  
505 from one another (Davis et al., 2015). Dia could be required for macrophages specifically  
506 when they face resistance from their surroundings. Modeling indicates that Dial's regulation  
507 of cortical tension requires an optimal combination of actin cross linking and intermediate  
508 actin filament length (Chugh et al., 2017). *Drosophila* Dia is a more processive nucleator  
509 than Ena (Bilancia et al., 2014) and thus could create the intermediate length actin filaments

Belyaeva et al

510 that enable higher levels of macrophage cortical tension and strain stiffening (Kasza et al.,  
511 2010) on all sides of the cell during their invasion.

512 Our findings thus demonstrate that there are commonalities in the molecular  
513 mechanisms by which *Drosophila* cells invade into either confluent tissues or the ECM.  
514 Dfos's upregulation of the Filamin Cheerio is also required in tumor cells and aneuploid  
515 epithelial cells to enhance ECM breaching (Külshammer & Uhlirova, 2013; Benhra et al.,  
516 2018). Both cell types displayed enhanced levels of cortical filamentous actin, which in the  
517 tumors is concomitant with Dia upregulation (Külshammer & Uhlirova, 2013). In the  
518 oocyte, Filamin is required for follicle cell intercalation and border cells display higher  
519 levels of Filamin and F-actin to maintain cellular integrity during migration between nurse  
520 cells (Sokol & Cooley, 2003; Somogyi & Rørth, 2004). The mediator of these increased F-  
521 actin levels, MAL-D, can be activated by Dia (Somogyi & Rørth, 2004). Thus while MMPs  
522 may be specific to ECM crossing, a denser and more cross linked actin cortex due to  
523 increased levels of the filamin Cheerio and activity of the formin Dia could be a common  
524 feature of *Drosophila* cells moving through the resistance of either ECM or surrounding  
525 tissues. Determining if such shifts in cell surface actin properties underlie some cancer cells'  
526 capacity to metastasize even in the presence of MMP inhibitors is an interesting area of  
527 inquiry (Butcher et al 2009; Kessenbrock et al 2010).

528

### 529 **Implications for vertebrate immune cell migration**

530 Our work also suggests a new perspective on the migration of some vertebrate  
531 immune cells. We find that altering lamin levels does not normally affect *Drosophila*  
532 macrophage tissue invasion. This contrasts with results showing that nuclear deformability  
533 from lower lamin levels underlies the migration of some immune cell types through narrow  
534 constrictions engineered from rigid materials (Davidson et al., 2014; Thiam et al, 2016).

Belyaeva et al

535 However, negotiation of such extremely challenging *in vitro* environments can lead to DNA  
536 damage (Raab et al., 2016) and higher nuclear flexibility caused by lower lamin levels is  
537 associated with increased cell death (Harada et al., 2014). A robust cell surface actin layer  
538 would allow long-lived cells or those not easily replenished to protect their genome as they  
539 move through resistant yet deformable environment. Embryonic *Drosophila* and vertebrate  
540 tissue resident macrophages migrate into tissues during development, survive into the adult,  
541 and serve as founders of proliferative hematopoietic niches (Holz et al., 2003; Makhijani et  
542 al., 2011; Bosch et al., 2019; Ginhoux and Guilliams, 2016; Theret et al 2019; Guilliams et  
543 al, 2020). Tissue resident memory T cells migrate in response to infection in mature animals,  
544 are long-lived and not easily renewed from the blood (Szabo et al., 2019). Thus the  
545 importance of nuclear mechanics for migration in challenging *in vivo* environments should  
546 be explored for a broader range of immune cells as well as the utilization of cortical actin as  
547 a strategy for genomic protection.

548

549

## 550 **Materials and Methods**

### 551 **Fly strains and genetics**

552 Flies were raised on standard food bought from IMBA (Vienna, Austria) containing agar,  
553 cornmeal, and molasses with the addition of 1.5% Nipagin. Adults were placed in cages in a  
554 fly room or a Percival DR36VL incubator maintained at 25°C and 65% humidity or a Sanyo  
555 MIR-153 incubator at 29°C within the humidity controlled 25°C fly room; embryos were  
556 collected on standard plates prepared in house from apple juice, sugar, agar and Nipagin  
557 supplemented with yeast from Lesaffre (Marcq, France) on the plate surface. Fly crosses and  
558 embryo collections for RNA interference experiments (7 hour collection) as well as live

Belyaeva et al

559 imaging (6 hour collection) were conducted at 29°C to optimize expression under GAL4  
560 driver control (Duffy, 2002). All fly lines utilized are listed below.

561

## 562 **Fly stocks**

563 *srpHemo-GAL4 (mac>)* was provided by K. Brückner (UCSF, USA)(Brückner et al., 2004).

564 *Oregon R (control)*, *P{CaryP}attP2 (control)*, *P{CaryP}attP40 (control)*, *kay<sup>2</sup> (Dfos<sup>2</sup>)*,

565 *(UAS-Fra)2 (Dfos)*, *UAS-Rho1.N19 Rho1DN*, *UAS-fbz (DfosDN)*, *UAS-kayak RNAi (Dfos*

566 *RNAi)* TRiP HMS00254 and TRiP JF02804, *UAS-dia RNAi* TRiP HM05027, *UAS-LamC*

567 *RNAi* TRiP JF01406 and TRiP HMS00308, *e22c-GAL4 (ecto>)*, *Resille::GFP*, *UAS-*

568 *GFP.nls*, *UAS-mCherry.nls*, *UAS-CD8::GFP* lines were obtained from the Bloomington

569 Stock Center (Indiana, USA). *kay<sup>1</sup> (Dfos<sup>1</sup>)* line was provided by O. Schuldiner (WIS, Israel).

570 *UAS-dia.deltaDad.EGFP (diaCA)* and *srpHemo-GAL4 UAS-CLIP::GFP*

571 *(mac>CLIP::GFP)* lines were provided by B. Stramer (KCL, UK). *UAS-cher.FLAG (cher)*

572 line was provided by M. Uhlirova (CECAD, Germany). *w[1118] (control)*, *UAS-cher RNAi*

573 *KK107451*, *UAS-TM4SF RNAi* *KK102206*, *UAS-Lam RNAi<sup>1</sup> GD45636*, *UAS-Lam RNAi<sup>2</sup>*

574 *KK107419* lines were obtained from the Vienna *Drosophila* Resource Center (Austria).

## 575 **Extended genotypes:**

576 Here we list the lines used in each Fig; we state first the name from FlyBase; in parentheses

577 the name used in the Fig panels is provided.

## 578 **Fig 1 and S1 Fig:**

579 Fig 1D: *Oregon R*. Fig 1E-G and S1A Fig: *srpHemo-GAL4*, *UAS-GFP (control)*. Fig 1H:

580 *srpHemo-GAL4*, *UAS-GFP*; *kay<sup>1</sup> (Dfos<sup>1</sup>)*. Fig 1I-L and S1B, G Fig: *srpHemo-GAL4*, *UAS-*

581 *GFP.nls/+ (control 1)*. Fig 1H, 1J, 1N: *srpHemo-GAL4*, *UAS-GFP/+*; *kay<sup>1</sup> (Dfos<sup>1</sup>)*. Fig 1K, 1N

582 and S1B Fig: *srpHemo-GAL4*, *UAS-GFP.nls/+*; *kay<sup>2</sup> (Dfos<sup>2</sup>)* Fig 1L, 1N: *srpHemo-GAL4*, *UAS-*

583 *GFP.nls/(UAS-Fra)2*; *kay<sup>2</sup> (Dfos<sup>2</sup>;mac>Dfos)*. Fig 1O, 1Q and S1C-E Fig: *srpHemo-Gal4*,

Belyaeva et al

584 *srpHemo-H2A::3xmCherry/+* (control 2). Fig 1P-Q and S1C-E Fig: *srpHemo-Gal4, srpHemo-*  
585 *H2A::3xmCherry/UAS-fbz* (*mac>DfosDN*). Fig 1R and S1F Fig: *srpHemo-GAL4, UAS-GFP,*  
586 *UAS-H2A::RFP/ P{CaryP}attP2* (control). Fig 1R and S1F Fig: *srpHemo-GAL4, UAS-GFP,*  
587 *UAS-H2A::RFP /UAS-kayak* RNAi HMS00254 and JF02804 (*mac>Dfos RNAi<sup>1</sup>, mac>Dfos*  
588 *RNAi<sup>2</sup>*). S1G Fig: *srpHemo-GAL4, UAS-GFP.nls/(UAS-Fra)2* (*mac>Dfos*).

589 **Fig 2 and S2 Fig:**

590 Fig 2A, 2C-I and S2A-B, E Fig: *srpHemo-Gal4, srpHemo-H2A::3xmCherry/+* (control). Fig  
591 2D: *srpHemo-Gal4, srpHemo-H2A::3xmCherry/+* (3 movies) and *Resille::GFP/+; srpHemo-*  
592 *Gal4, srpHemo-H2A::3xmCherry/+* (4 movies, control) and *Resille::GFP/+; srpHemo-Gal4,*  
593 *srpHemo-H2A::3xmCherry/+* (3 movies) and *Resille::GFP/+; srpHemo-Gal4, srpHemo-*  
594 *H2A::3xmCherry/UAS-DfosDN* (4 movies, *DfosDN*) Fig 2A, 2C-I and S2A-B, E Fig: *srpHemo-*  
595 *Gal4, srpHemo-H2A::3xmCherry/UAS-fbz* (*mac>DfosDN*). S2C-D Fig: *srpHemo-GAL4, UAS-*  
596 *GFP.nls/+* (control). S2C-D Fig: *srpHemo-GAL4, UAS-GFP.nls/+; kay<sup>2</sup>* (*Dfos<sup>2</sup>*).

597 **Fig 3 and S3 Fig:**

598 Fig 3C, G and S3D Fig: *UASDicer2;; srpHemo-Gal4, srpHemo-H2A::3xmCherry/w<sup>1118</sup>*  
599 (control). Fig 3D, 3G and S3D Fig: *UASDicer2; UAS-TM4SF RNAi KK10220/+; srpHemo-*  
600 *Gal4, srpHemo-H2A::3xmCherry/+* (*mac>TM4SF RNAi*). Fig 3E, G and S3D Fig:  
601 *UASDicer2; UAS-cher RNAi KK107451/+; srpHemo-Gal4, srpHemo-H2A::3xmCherry/+*  
602 (*mac>cher RNAi*). Fig 3F-G: *UAS-Dicer2; UAS-cher RNAi KK107451/UAS-TM4SF RNAi*  
603 *KK102206; srpHemo-Gal4, srpHemo-H2A::3xmCherry/+* (*mac>TM4SF RNAi, cher RNAi*).  
604 Fig 3H, L: *srpHemo-GAL4, UAS-mCherry.nls/UAS-mCD8::GFP* (control). Fig 3I, L:  
605 *srpHemo-GAL4, UAS-mCherry.nls/UAS-mCD8::GFP; UAS-fbz/+* (*mac>DfosDN*). Fig 3J,  
606 L: *srpHemo-GAL4, UAS-mCherry.nls/UAS-cheerio.FLAG; UAS-fbz/+* (*mac>DfosDN, cher*).  
607 Fig 3K-L: *srpHemo-GAL4, UAS-mCherry.nls/UAS-TM4SF; UAS-fbz/+* (*mac>DfosDN,*  
608 *TM4SF*). Fig 3L: *srpHemo-GAL4, UAS-mCherry.nls/ UAS-TM4SF* (*mac>TM4SF*). Fig 3L:

Belyaeva et al

609 *srpHemo-GAL4, UAS-mCherry.nls/ UAS-cher (mac>cher)*. S3A-C Fig: *srpHemo-Gal4*,  
610 *srpHemo-3xmCherry/+ (control)*. S3A-C Fig: *srpHemo-Gal4, srpHemo-3xmCherry/UAS-fbz*  
611 *(mac>DfosDN)*.

612 **Fig 4 and S4 Fig:**

613 Fig 4B, D: *srpHemo-Gal4, srpHemo-moe::3xmCherry/+;UAS-mCD8::GFP/+*  
614 *(Control)*. Fig 4C-D: *srpHemo-Gal4, srpHemo-moe::3xmCherry/UAS-fbz (mac>DfosDN)*.  
615 Fig 4E-F: *srpHemo-Gal4, srpHemo-moe::3xmCherry/w118 (Control)*. Fig 4E, G: *srpHemo-*  
616 *Gal4, srpHemo-moe::3xmCherry/UAS>cher*  
617 *RNAi KK107451 (mac>cher RNAi)*. Fig 4E, H: *srpHemo-Gal4, srpHemo-*  
618 *moe::3xmCherry/UAS>TM4SF RNAi KK102206 (mac>TM4SF RNAi)*. Fig 4I-J: *srpHemo-*  
619 *GAL4, UAS-mCherry.nls/UAS-mCD8::GFP (control)*. Fig 4I', J:  
620 *srpHemo-GAL4, UAS-mCherry.nls/UAS-Dia.deltaDad.EGFP; UAS-fbz/+ (mac>*  
621 *DfosDN, diaCA)*. Fig 4J: *srpHemo-GAL4, UAS-mCherry.nls/UAS-mCD8::GFP; UAS-fbz/+*  
622 *(mac>DfosDN)*. Fig 4J: *srpHemo-GAL4, UAS-mCherry.nls/ UAS-Dia.deltaDad.EGFP*  
623 *(mac>diaCA)*. Fig 4K-L and S4B-C Fig: *UASDicer2;; srpHemo-Gal4, srpHemo-*  
624 *H2A::3xmCherry/P{CaryP}attP40 (control)*. Fig 4K', L and S4B-C Fig: *UASDicer2;+;*  
625 *srpHemo-Gal4, srpHemo-H2A::3xmCherry/ UAS-dia RNAi HM05027 (mac>dia RNAi<sup>1</sup>)*. Fig  
626 4L and S4B-C Fig: *UASDicer2;+; srpHemo-Gal4, srpHemo-H2A::3xmCherry/UAS-dia*  
627 *RNAi HMS00308 (mac>dia RNAi<sup>2</sup>)*.

628 **Fig 5 and S5 Fig:**

629 Fig 5A and S5A Fig: *srpHemo-Gal4 UAS-LifeActGFP UAS-RedStinger/ srpHemo-Gal4*  
630 *UAS-LifeActGFP, UAS-RedStinger control; srpHemo-Gal4 UAS-LifeActGFP UAS-*  
631 *RedStinger/ srpHemo-Gal4 UAS-LifeActGFP UAS-RedStinger; UAS-DfosDN/UAS-DfosDN*.  
632 Fig 5B-D and S5B-D Fig: *srpHemo-Gal4, UAS-CLIP::GFP, UAS-RedStinger (control)*. Fig  
633 5B-D and S5B-D Fig: *srpHemo-Gal4, UAS-CLIP::GFP, UAS-RedStinger; UAS-fbz*



Belyaeva et al

634 (*mac>DfosDN*). Fig 5E, G: *srpHemo-GAL4, UAS-mCherry.nls/UAS-mCD8::GFP (control)*.  
635 Fig 5E',E'', 5G: *srpHemo-GAL4, UAS-mCherry.nls/UAS-Lamin RNAi* GD45636,  
636 KK107419 (*mac>Lam RNAi<sup>1</sup>* and *mac>Lam RNAi<sup>2</sup>*, respectively). Fig 5E''', G: *srpHemo-*  
637 *GAL4, UAS-mCherry.nls/UAS-LaminC RNAi* TRIP JF01406 (*mac>LamC RNAi*). Fig 5F-G:  
638 *srpHemo-GAL4, UAS-mCherry.nls/UAS-mCD8::GFP; UAS-fbz/+ (mac>DfosDN)*. Fig  
639 5F',F'', G: *srpHemo-GAL4, UAS-mCherry.nls/UAS-Lam RNAi (Lam RNAi<sup>1</sup>=GD45636, Lam*  
640 *RNAi<sup>2</sup>=KK107419); UAS-fbz/+ (mac>DfosDN, Lam RNAi<sup>1</sup> and mac>DfosDN, Lam RNAi<sup>2</sup>)*.  
641 Fig 5F''', G: *srpHemo-GAL4, UAS-mCherry.nls/UAS-LaminC RNAi* TRIP JF01406; *UAS-*  
642 *fbz/+ (mac>DfosDN, LamC RNAi)*. Fig 5H: *e22CGal4,srpHemo-H2A::3xmCherry/+*  
643 (*control*). Fig 5H: *srpQF/ srpHemo-H2A::3xmCherry; QUAS-fbz/UAS-Rho1.N12*  
644 (*mac<>DfosDN*). Fig 5H: *e22CGal4, srpHemo-H2A::3xmCherry/srpQF; +/- UAS-Rho1.N12*  
645 (*ecto>Rho1DN*). Fig 5H: *srpQF/ e22C-Gal4, srpHemo-H2A::3xmCherry; UAS-*  
646 *Rho1N12/QUAS-fbz (mac<>DfosDN, ecto>rhoDN)*. S5E Fig: *+/UAS-GFP::nls, srpHemo-*  
647 *GAL4 (control)*. *+/UAS-GFP::Lamin, srpHemo-GAL4*.

648

#### 649 **Cloning and generation of QUAS-DfosDN line**

650 The fragment was amplified from genomic DNA of the published *UAS-fbz (UAS-Dfos DN)*  
651 line (Eresh, Riese, Jackson, Bohmann, & Bienz, 1997) using primers encompassing a 5'  
652 consensus translation initiation sequence followed by the bZIP fragment and containing  
653 BglIII and XhoI restriction sites: 5'-GAAGATCTATTGGGAATTCAACATGACCCCG-3'  
654 and 5'-CCCTCGAGTCAGGTGACCACGCTCAGCAT-3'. The resulting fragment was  
655 cloned into the pQUAS<sub>St</sub> vector, a gift from Christopher Potter (Addgene plasmid # 104880).  
656 The final construct was sequenced and injected into the attP2 landing site by BestGene  
657 (Chino Hills, CA, USA).

658

Belyaeva et al

## 659 **Cloning and generation of UAS-TM4SF line**

660 The TM4SF open reading frame was amplified from the DGRC GH07902 cDNA clone  
661 (#3260, Fbcl0121651), using primers acagcgGAATTCATGGCATTGCCGAAGAAAAT  
662 and acagcgTCTAGATTAAGCTAATCGTCTGTCATT. The PCR product and the  
663 pUAS<sup>t</sup>-aTTB vector (DGRC plasmid #1419) were digested with EcoRI and XbaI, and  
664 ligated. After sequencing, the construct was injected into the landing site line, (*y<sup>1</sup> M{vas-*  
665 *int.Dm}ZH-2A w\**; *M{3xP3-RFP.attP}ZH-51D*, BL 24483), to produce second chromosome  
666 inserts. All male survivors were crossed to *w*; *Sp/CyO*; *PrDr/TM3Ser* virgins. Transformants  
667 were recognized by eye color and crossed again to *w*; *Sp/CyO*; *PrDr/TM3Ser* virgins to get  
668 rid of the X chromosomal integrase.

669

## 670 **Embryo staging:**

671 Laterally oriented embryos with complete germband (gb) extension and the presence of  
672 stomadeal invagination were staged based on gb retraction from the anterior as a percentage  
673 of total embryo length. Embryos with no gb retraction were classified as Stage 11, 30%  
674 retraction early Stage 12, 60% retraction Stage 12, and 70% Stage 13. Imaged embryos are  
675 shown throughout paper in a lateral orientation with anterior to the left and dorsal up.

676

## 677 ***In situ* hybridization and immunofluorescence**

678 Embryos were fixed with 3.7% formaldehyde/heptane for 20 min followed by methanol  
679 devitellinization for *in situ* hybridization and visualization of 3xmCherry. The *Dfos* cDNA  
680 clone SD04477 was obtained from the DGRC. T7 or T3 polymerase-synthesized  
681 digoxigenin-labelled anti-sense probe preparation and *in situ* hybridization was performed  
682 using standard methods (Lehmann & Tautz, 1994). Images were taken with a Nikon-Eclipse  
683 Wide field microscope with a 20X 0.5 NA DIC water Immersion Objective. Embryos were

Belyaeva et al

684 mounted after immunolabeling in Vectashield Mounting Medium (Vector Labs, Burlingame,  
685 USA) and imaged with a Zeiss Inverted LSM700 and LSM800 Confocal Microscope using a  
686 Plain-Apochromat 20X/0.8 Air Objective or a Plain-Apochromat 63X/1.4 Oil Objective as  
687 required.

| Antibody     | Source animal | Dilution | Provided by                            |
|--------------|---------------|----------|----------------------------------------|
| Anti-Dfos    | Rabbit        | 1:50     | J. Zeitlinger (Stowers Institute, USA) |
| Anti-GFP     | Chicken       | 1:500    | Abcam (ab13970)                        |
| Anti-mCherry | Goat          | 1:200    | Invitrogen (M11217)                    |

688

### 689 **Dfos antibody**

690 The Dfos rabbit polyclonal antibody was produced for the lab of Julia Zeitlinger. It was  
691 raised by Genescript (Piscataway, NJ, USA) against the C-terminal end of *Drosophila* Kayak  
692 found in all isoforms and was purified against an N terminally His tagged antigen  
693 corresponding to aa 73 to 595 of Kay isoform A. The internal Genescript order number is  
694 163185-30, and in the Zeitlinger lab is referred to as anti-kay/fos Ab.

695

### 696 **Time-Lapse Imaging**

697 Embryos were dechorionated in 50% bleach for 5 min, washed with water, and mounted in  
698 halocarbon oil 27 (Sigma) on a 24x50mm high precision coverslip (Marienfeld Laboratory  
699 Glassware, No. 1.5H) between two bridges (~0.5 cm high) of coverslips glued on top of  
700 each other, or mounted in halocarbon oil 27 (Sigma) between a 18x18mm coverslip  
701 (Marienfeld Laboratory Glassware, No. 1.5H) and an oxygen permeable membrane (YSI).  
702 The embryo was imaged on an upright multiphoton microscope (TrimScope, LaVision)  
703 equipped with a W Plan-Apochromat 40X/1.4 oil immersion objective (Olympus). GFP and  
704 mCherry were imaged at 860 nm and 1100 nm excitation wavelengths, respectively, using a  
705 Ti-Sapphire femtosecond laser system (Coherent Chameleon Ultra) combined with optical  
706 parametric oscillator technology (Coherent Chameleon Compact OPO). Excitation intensity

Belyaeva et al

707 profiles were adjusted to tissue penetration depth and Z-sectioning for imaging was set at  
708 1  $\mu\text{m}$  for tracking. For long-term imaging, movies were acquired for 60 - 150 minutes with a  
709 frame rate of 25-45 seconds. A temperature control unit set to 29°C was utilized for all  
710 genotypes except *kay*<sup>2</sup> for which the setting was 25°C.

711

## 712 **Image Analysis**

713 **Macrophage cell counts:** Autofluorescence of the embryo revealed the position of the  
714 germband (gb) for staging of fixed samples. Embryos with 40% ( $\pm 5\%$ ) gb retraction (Stage  
715 12) were analysed for macrophage numbers in the pre-gb, within the germband, along the  
716 ventral nerve cord (vnc) and in the whole embryo. For the *kay RNAi* embryos with 70% gb  
717 retraction (Stage 13) were used for vnc counts. The pre-gb zone was defined based on  
718 embryo and yolk autofluorescence as an area on the yolk sac underneath the amnioserosa  
719 with borders defined posteriorly by the gb ectoderm and anteriorly by the head.  
720 Macrophages were visualized using confocal microscopy with a Z-stack step size of 2  $\mu\text{m}$   
721 and macrophage numbers within the gb or the segments of the vnc were calculated in  
722 individual slices (and then aggregated) using the Cell Counter plugin in FIJI. Total  
723 macrophage numbers were obtained using Imaris (Bitplane) by detecting all the macrophage  
724 nuclei as spots.

725

## 726 **Macrophage Tracking, Speed, Persistence. Mode of Migration and Macrophage gb** 727 **crossing Analysis**

728 Embryos with macrophage nuclei labelled with *srpHemo-H2A::3XmCherry* and the  
729 surrounding tissues with *Resille::GFP*, or with only macrophages labelled by *srpHemo-*  
730 *H2A::3XmCherry*, or *srpHemo>GFP.nls* were imaged and 250x250x40  $\mu\text{m}^3$  3D-stacks were  
731 typically acquired with  $\sim 0.2 \times 0.2 \times 1 \mu\text{m}^3$  voxel size every 39-41 seconds for  $\sim 2$  hours. For

Belyaeva et al

732 imaging macrophages on vnc frames were acquired at every 40-43 seconds for 30 min after  
733 macrophages started spreading into abdominal segment 2 (see Fig 2G). Multiphoton  
734 microscopy images were initially processed with ImSpector software (LaVision Bio Tec) to  
735 compile channels, and exported files were further processed using Imaris software (Bitplane)  
736 for 3D visualization.  
737 Each movie was rotated and aligned along the embryonic AP axis for tracking analysis. For  
738 analysis of migration in the pre-gb and gb in the control and *kay*<sup>2</sup> mutant, embryos were  
739 synchronized using the onset of germ and retraction. For vnc migration analysis,  
740 macrophages were tracked for 30 minutes from when macrophages started moving into the  
741 second abdominal segment. Only macrophages migrating along the inner edge of the vnc  
742 were analyzed.  
743 Gb crossing time was calculated from when the macrophages align in front of the gb  
744 ectoderm in a characteristic arc, until the first macrophage had transitioned its nucleus inside  
745 the ecto-meso-interphase. To see the gb edge and yolk in movies of *srpHemo-*  
746 *3xH2A::mCherry*, either *Resille::GFP* labelling the outlines of all cells, or the auto-  
747 fluorescence of the yolk was used.  
748 For analysis of gb migration in the *DfosDN* vs control macrophages, macrophages were  
749 tracked from when the first macrophage appeared between the ectoderm and the yolk sac  
750 until gb retraction started, typically 60 minutes. In the head and pre-gb, macrophage nuclei  
751 were extracted using the spot detection function, and tracks generated in 3D over time. The  
752 pre-gb and gb were defined as for macrophage counts described above. The mean position  
753 of the tracks in X- and Y restrict analysis to each migratory zones.  
754 Cell speed and persistence were calculated from nuclei positions using custom Python  
755 scripts as described elsewhere (Smutny et al., 2017). Briefly, instantaneous velocities from  
756 single cell trajectories were averaged to obtain a mean instantaneous velocity value over the

Belyaeva et al

757 course of measurement. The directional persistence of a trajectory was calculated as the  
758 mean cosine of an angle between subsequent instantaneous velocities:

759 
$$I(v_1, \dots, v_l) = \frac{1}{l-1} \sum_{k=1}^{l-1} \cos(v_k, v_{k+1}),$$

760 where  $l$  is duration of the trajectory and  $v_1, \dots, v_l$  are its instantaneous velocities. Only  
761 trajectories with a minimal duration of 15 timeframes were used. Calculated persistence  
762 values were averaged over all trajectories to obtain a persistence index ( $I$ ) for the duration  
763 of measurement (with -1 being the lowest and 1 the maximum). 3-6 embryos were  
764 recorded and analyzed for each genotype, numbers of control and perturbed embryos are  
765 equal in each pairwise comparison.

766

#### 767 **Measurement of junctional Phalloidin**

768 The junctional intensity of F-actin (Phalloidin) was calculated using linescan analysis as  
769 previously described (Smutny et al., 2010) with the following changes. The line was  $\sim 5 \mu\text{m}$   
770 and was always drawn in the middle slice of the Z stack ( $1 \mu\text{m}$  resolution) of the  
771 macrophage-macrophage junction. For every line, a Gaussian fit was applied and maximum  
772 intensities across the cell junction were then normalized against average intensities of F-  
773 actin (Phalloidin) staining in the stereotypical gb area of  $\sim 50 \times 50 \mu\text{m}^2$  in each embryo.  
774 Analyses were carried out using standard Fiji software. 4-5 embryos were analysed per  
775 genotype. Macrophages in the pre-gb or gb entry zones were analyzed.

776

#### 777 **Measurement of F-actin reporters**

778 To quantify cortical F-actin intensity in living embryos, a *srpHemo-moe::3xmCherry*  
779 reporter line (Gyoergy et al., 2018) was crossed into a background of macrophages  
780 expressing *DfosDN*, *cher RNAi*, or *TM4SF RNAi*. Embryos were collected for 5h 30min at

Belyaeva et al

781 29°C, de-chorionated in 50% bleach for 5 min, rinsed thoroughly with water, and aligned  
782 laterally side by side under a stereomicroscope using a fluorescence lamp to check for the  
783 presence of mCherry. Aligned embryos were then mounted as described in the live imaging  
784 section above. To image Moe::3xmCherry, a Zeiss LSM800 inverted microscope was used  
785 with the following settings: Plan-APOCHROMAT 40x/1.4 Oil, DIC, WD=0.13 objective,  
786 1.5x zoom, 1025x1025 pixel, speed 8, heating chamber set to 29°C, z-interval 1µm. Laser  
787 settings were kept constant in all experiments. Images were acquired during macrophage  
788 invasion into the gb (St 12). Pseudo-coloring was conducted for the mCherry red channel.  
789 Each pixel in the image has a color ascribed to it via the fire “Look Up Table” translating the  
790 level of intensity of the mCherry channel into a defined amount of each color. The highest  
791 intensity of the image is represented as very bright yellow and all other grey values are  
792 depicted as colors on the scale accordingly.

793 For quantification of Moe::3xmCherry intensity, an ROI was drawn in Fiji software  
794 around macrophages at the germband entry site in 20 z-stacks for each embryo. The area  
795 mean intensity was measured in all ROIs and the average/embryo was calculated. To  
796 normalize fluorescence intensities per batch, the average intensity/embryo of all ROIs in  
797 each sample was divided by the arithmetic mean of the average intensity/embryo of all ROIs  
798 in the control per batch. The normalized average intensities/embryo were then compared to  
799 each other using a t-test with Welch’s correction for *DfosDN* and one way-ANOVA for *cher*  
800 *RNAi* and *TM4SF RNAi*.

### 801 **Cell aspect ratio analysis and imaging actin dynamics**

802 Laterally oriented embryos were used to measure the maximal length and width of  
803 macrophages expressing *UAS-CLIP::GFP* under the control of *srpHemoGal4*. Briefly, 3D-  
804 stacks with 1 µm Z resolution were acquired every 35-45 seconds for approximately 1 hour.  
805 As the strength of the GAL4 expression increased over time, laser power was adjusted

Belyaeva et al

806 during acquisition to reach the best possible quality of visualization. Images acquired from  
807 multiphoton microscopy were initially processed with ImSpector software (LaVision Bio  
808 Tec) to compile channels from the imaging data.  
809 We started measuring from the time the cell body of the first macrophage fully appeared at  
810 the interface between the ectoderm and mesoderm and yolk sac until it had moved 30  $\mu\text{m}$   
811 along the ectoderm mesoderm interface. At each timeframe, a line was drawn in Fiji along  
812 the longest dimension of the macrophage in the direction of its front-rear polarization axis,  
813 denoted the maximal cell length, and along the orthogonal longest dimension, which was  
814 considered maximal cell width. We did not observe long CLIP::GFP protrusions, but when a  
815 small protrusion was present, it was not included in the length measurement; within this gb  
816 region the front of the first macrophage was clearly outlined with CLIP::GFP. The border  
817 between the first and second entering macrophages was drawn based on the uninterrupted  
818 intense line of CLIP::GFP at the base of the first macrophage; only cells with a clearly  
819 visible border were measured. The length to width ratio was quantified for each timeframe  
820 and a probability density function was plotted: 5 embryos were recorded for each genotype.

821

### 822 **Imaging the actin protrusion**

823 Laterally oriented embryos expressing *srpHemo-Gal4 UAS-LifeAct::GFP* were used to image  
824 macrophage actin live with a 3D-stack resolution of  $1\mu\text{m}$ . See above description of  
825 CLIP::GFP labeled macrophage imaging for laser power and image compilation. Laser power  
826 was also increased further in the DfosDN samples to enhance actin visualization. We  
827 measured the length of the filopodia-like protrusion of the first entering macrophage with  
828 Imaris software (Bitplane) from the time when the protrusion was inserted into the ectoderm,  
829 mesoderm and yolk sac interface until the macrophage started to translocate its cell body into  
830 that location.



Belyaeva et al

831

832 **FACS sorting of macrophages**

833 Adult flies of either *w;+;srpHemoGal4,srpHemo::3xmCherry/+* or *w;+;*

834 *srpHemoGal4,srpHemo::3xmCherry /UASDfosDN* genotypes were placed into plastic cages

835 closed with apple juice plates with applied yeast to enhance egg laying. Collections were

836 performed at 29°C for 1 hour, then kept at 29°C for additional 5 hours 15 minutes to reach

837 stage 11-early stage 12. Embryos were harvested for 2 days with 6-7 collections per day and

838 stored meanwhile at +4°C to slow down development. Collected embryos were dissociated

839 and the macrophages sorted as previously described (Gyoergy et al., 2018). About  $1-1.5 \times 10^5$

840 macrophages were sorted within 30 minutes.

841

842 **Sequencing of the macrophage transcriptome**

843 Total RNA was isolated from FACS-sorted macrophages using Qiagen RNeasy Mini kit (Cat

844 No. 74104). The quality and concentration of RNA was determined using Agilent 6000 Pico

845 kit (Cat No. 5067-1513) on an Agilent 2100 Bioanalyzer: on average about 100 ng of total

846 RNA was extracted from  $1.5 \times 10^5$  macrophages. RNA sequencing was performed by the CSF

847 facility of Vienna Biocenter according to standard procedures

848 (<https://www.vbcf.ac.at/facilities/next-generation-sequencing/>) on three replicates. Briefly,

849 the cDNA library was synthesized using QuantSeq 3' mRNA-seq Library Prep kit and

850 sequenced on the Illumina HiSeq 2500 platform. The reads were mapped to the *Drosophila*

851 *melanogaster* Ensembl BDGP6 reference genome with STAR (version 2.5.1b) The read

852 counts for each gene were detected using HTSeq (version 0.5.4p3). The Flybase annotation

853 (r6.19) was used in both mapping and read counting. Counts were normalised to arbitrary

854 units using the TMM normalization from edgeR package in R. Prior to statistical testing the

855 data was voom transformed and then the differential expression between the sample groups

Belyaeva et al

856 was calculated with limma package in R. The functional analyses were done using the topGO  
857 and gage packages in R (Anders, Pyl, & Huber, 2015; Dobin et al., 2013).

| <b>Primer</b> | <b>Sequence</b>        |
|---------------|------------------------|
| Fos_fw        | ATGGTGAAGACCGTGTCAGG   |
| Fos_rv        | GTTGATCTGTCTCCGCTTGG   |
| Flna_fw       | GTCACAGTGTCAATCGGAGGT  |
| Flna_rv       | TTGCCTGCTGCTTTTGTGTC   |
| Flnb_fw       | TTCTACACTGCTGCCAAGCC   |
| Flnb_rv       | CTGTAACCCAGGGCCTGAATC  |
| Flnc_fw       | CATCACCCGGAGTCCTTTC    |
| Flnc_rv       | CTCTGTGCCCTTTGGACCTT   |
| Tspan6_fw     | TCGAACTAGTTGCCGCCATT   |
| Tspan6_rv     | CCGCAACAATGCAACGTACT   |
| Gstt3_fw      | GGAGCTCTACCTGGACCTGA   |
| Gstt3_rv      | AAGATGGCCACACTCTCTGC   |
| Evalc_fw      | GTTGCCTACGCATGTGTTCC   |
| Evalc_rv      | CCGATGCAGACACTGGACAT   |
| Tspo_fw       | GTATTCAGCCATGGGGTATGG  |
| Tspo_rv       | AAGCAGAAGATCGGCCAAGG   |
| Tbp_fw        | GGGGAGCTGTGATGTGAAGT   |
| Tbp_rv        | CCAGGAAATAATTCTGGCTCAT |

858 **qRT-PCR analysis of mRNA levels in murine bones and osteosarcomas**

859 RNA isolation and qPCR was performed from bones of wild-type C57BL/6 mice and from  
860 bones and osteosarcomas (OS) of H2-c-fosLTR as previously described with the above  
861 primers (Rüther et al., 1989).

862

863 **Statistical and Repeatability**

864 Mouse experiments:

865 Data are shown as mean  $\pm$  SEM. One-way ANOVA followed by Tukey's multiple  
866 comparisons post-test was applied to compare experimental groups. Statistical analysis was  
867 performed using GraphPad Prism 6.0 software. A p-value  $<0.05$  was considered statistically  
868 significant (\* $p<0.05$ , \*\* $p<0.01$ , \*\*\* $p<0.001$ , \*\*\*\* $p<0.0001$ ).

869 *Drosophila* experiments:

Belyaeva et al

870 Statistical tests as well as the number of embryos/cells/tracks/contacts assessed are listed in  
871 the Figure legends. All statistical analyses were performed using GraphPad PRISM or R  
872 Studio and significance was determined using a 95% confidence interval. No statistical  
873 method was used to predetermine sample size. An unpaired t-test and Mann-Whitney U Test  
874 were used to calculate the significance in differences between two groups and One-Way  
875 ANOVA followed by Tukey HSD post hoc test was used for multiple comparisons.

876 Representative images of Dfos antibody staining were analyzed per replicate per genotype  
877 and *in situ* hybridization are from experiments that were repeated 2 times with many  
878 embryos with reproducible results. Representative images and plots of different *Dfos* mutants  
879 in Fig 1 and S1 Fig are from experiments that were repeated 2-3 times. In live imaging  
880 experiments in Fig 2 and S2 Fig, 3-7 embryos for each genotype were analyzed, each embryo  
881 was recorded in a separate day. Three replicates were conducted of FACS sorting  
882 macrophages from embryos, and then preparing RNA samples for RNA sequencing for each  
883 genotype. Representative images and plots of RNAi and rescue experiments in Fig 4 and S4  
884 Fig are from experiments that were repeated 2-3 times. Representative images and plots of  
885 phalloidin immunostaining in Fig 4 are from experiments that were repeated 4 times. For all  
886 immunostaining experiments 3-7 embryos were analyzed per replicate per genotype. In  
887 *Moe::3xmCherry* experiments in Fig 4D, 11 and 12 embryos were analysed for the control  
888 and *DfosDN*, and in Fig 4E 10, 8, and 8 embryos were analysed for the control, *cher RNAi*,  
889 and *TM4SF RNAi* respectively, as indicated in the graph and in the relevant part of the F-  
890 actin reporter measurement section of the methods. In the *LifeAct::GFP* protrusion live  
891 imaging experiment in Fig 5 and S5 Fig, 3-5 embryos were analyzed for each genotype. In  
892 *CLIP::GFP* live imaging experiments in Fig 5 and S5 Fig, 5-6 embryos were analyzed for  
893 each genotype for the cell aspect ratio in germband zone, and 2 embryos in pre-germband  
894 zone and for tracking of the front vs rear speed. Each embryo was recorded on a separate

Belyaeva et al

895 day. The Lamin over expression in S5 Fig and the Lamin knockdown rescue experiments in  
896 Fig 5G were repeated at least 3 times with reproducible results. Gb rescue experiment in Fig  
897 5H was repeated at least 4 times with reproducible results.

898

899

### Acknowledgements

900 We thank the following for their contributions: The *Drosophila* Genomics Resource Center  
901 supported by NIH grant 2P40OD010949-10A1 for plasmids, K. Brueckner, B. Stramer, M.  
902 Uhlirova, O. Schuldiner, the Bloomington *Drosophila* Stock Center supported by NIH grant  
903 P40OD018537 and the Vienna *Drosophila* Resource Center for fly stocks, FlyBase  
904 (Thurmond et al., 2019) for essential genomic information, and the BDGP *in situ* database  
905 for data (Tomancak et al., 2002, 2007). For antibodies, we thank the Developmental Studies  
906 Hybridoma Bank, which was created by the Eunice Kennedy Shriver National Institute of  
907 Child Health and Human Development of the NIH, and is maintained at the University of  
908 Iowa, as well as J. Zeitlinger for her generous gift of Dfos antibody. We thank the Vienna  
909 BioCenter Core Facilities for RNA sequencing and analysis and the Life Scientific Service  
910 Units at IST Austria for technical support and assistance with microscopy and FACS  
911 analysis. We thank C.P. Heisenberg, P. Martin, M. Sixt and Siekhaus group members for  
912 discussions and T.Hurd, A. Ratheesh and P. Rangan for comments on the manuscript. A.G.  
913 was supported by the Austrian Science Fund (FWF) grant DASI\_FWF01\_P29638S, D.E.S.  
914 by Marie Curie CIG 334077/IRTIM. M.S. is supported by the FWF, PhD program W1212  
915 and the European Research Council (ERC) Advanced grant (ERC-2015-AdG TNT-Tumors  
916 694883). S.W. is supported by an OEAW, DOC fellowship.

917 **References**

- 918 Anders, S., Pyl, P. T., & Huber, W. (2015). HTSeq-A Python framework to work with high-throughput  
919 sequencing data. *Bioinformatics*, 31(2), 166–169. <https://doi.org/10.1093/bioinformatics/btu638>
- 920 Andrés, V., & González, J. M. (2009). Role of A-type lamins in signaling, transcription, and chromatin  
921 organization. *Journal of Cell Biology*, 187(7), 945–957. <https://doi.org/10.1083/jcb.200904124>
- 922 Bellanger, J. M., Astier, C., Sardet, C., Ohta, Y., Stossel, T. P., & Debant, A. (2000). The Rac1- and RhoG-  
923 specific GEF domain of trio targets filamin to remodel cytoskeletal actin. *Nature Cell Biology*, 2(12),  
924 888–892. <https://doi.org/10.1038/35046533>
- 925 Benhra, N., Barrio, L., Muzzopappa, M., & Milán, M. (2018). Chromosomal Instability Induces Cellular  
926 Invasion in Epithelial Tissues. *Developmental Cell*, 47(2), 161-174.e4.  
927 <https://doi.org/10.1016/j.devcel.2018.08.021>
- 928 Berditchevski, F., & Odintsova, E. (1999). Characterization of integrin-tetraspanin adhesion complexes: Role of  
929 tetraspanins in integrin signaling. *Journal of Cell Biology*, 146(2), 477–492.  
930 <https://doi.org/10.1083/jcb.146.2.477>
- 931 Bershady, A. D., Balaban, N. Q., & Geiger, B. (2003). Adhesion-Dependent Cell Mechanosensitivity. *Annual*  
932 *Review of Cell and Developmental Biology*, 19(1), 677–695.  
933 <https://doi.org/10.1146/annurev.cellbio.19.111301.153011>
- 934 Bilancia, C. G., Winkelman, J. D., Tsygankov, D., Nowotarski, S. H., Sees, J. A., Comber, K., ... Peifer, M.  
935 (2014). Enabled negatively regulates diaphanous-driven actin dynamics in vitro and in vivo.  
936 *Developmental Cell*, 28(4), 394–408. <https://doi.org/10.1016/j.devcel.2014.01.015>
- 937 Bosch, P.S., Makhijani, K., Herboso, L., Gold, K.S., Baginsky, R., Woodcock, K.J., Alexander, B., Kukar, K.,  
938 Corcoran, S., Jacobs, T., Ouyang, D., Wong, C., Ramond, E.J.V., Rhiner, C., Moreno, E., Lemaitre, B.,  
939 Geissmann, F., & Brueckner, K. (2019). Adult *Drosophila* lack hematopoiesis but rely on a blood cell  
940 reservoir at the respiratory epithelia to relay infection signals to surrounding tissues. *Developmental Cell*,  
941 51(6)787-803.  
942 <https://doi.org/10.1016/j.devcel.2019.10.017>
- 943 Brock, A. R., Wang, Y., Berger, S., Renkawitz-Pohl, R., Han, V. C., Wu, Y., & Galko, M. J. (2012).  
944 Transcriptional regulation of profilin during wound closure in *Drosophila* larvae. *Journal of Cell Science*,  
945 125(23), 5667–5676. <https://doi.org/10.1242/jcs.107490>
- 946 Brückner, K., Kockel, L., Duchek, P., Luque, C. M., Rørth, P., & Perrimon, N. (2004). The PDGF/VEGF

Belyaeva et al

- 947 receptor controls blood cell survival in *Drosophila*. *Developmental Cell*, 7(1), 73–84.  
948 <https://doi.org/10.1016/j.devcel.2004.06.007>
- 949 Brzozowski, J. S., Bond, D. R., Jankowski, H., Goldie, B. J., Burchell, R., Naudin, C., ... Weidenhofer, J.  
950 (2018). Extracellular vesicles with altered tetraspanin CD9 and CD151 levels confer increased prostate  
951 cell motility and invasion. *Scientific Reports*, 8(1). <https://doi.org/10.1038/s41598-018-27180-z>
- 952 Butcher, D.T., Alliston, T. & Weaver, V.M.(2009). A tense situation: forcing tumour progression. *Nature*  
953 *Reviews Cancer*, 9(2), 108-22. . <https://doi.org/10.11038/nrc2544>
- 954 Cho, N. K., Keyes, L., Johnson, E., Heller, J., Ryner, L., Karim, F., & Krasnow, M. A. (2002). Developmental  
955 control of blood cell migration by the *Drosophila* VEGF pathway. *Cell*, 108(6).  
956 [https://doi.org/10.1016/S0092-8674\(02\)00676-1](https://doi.org/10.1016/S0092-8674(02)00676-1)
- 957 Chugh, P., Clark, A. G., Smith, M. B., Cassani, D. A. D., Dierkes, K., Ragab, A., ... Paluch, E. K. (2017). Actin  
958 cortex architecture regulates cell surface tension. *Nature Cell Biology*, 19(6), 689–697.  
959 <https://doi.org/10.1038/ncb3525>
- 960 Danuser, G., Allard, J., & Mogilner, A. (2013). Mathematical Modeling of Eukaryotic Cell Migration: Insights  
961 Beyond Experiments. *Annual Review of Cell and Developmental Biology*, 29(1).  
962 <https://doi.org/10.1146/annurev-cellbio-101512-122308>
- 963 Davidson, A. J., Millard, T. H., Evans, I. R., & Wood, W. (2019). Ena orchestrates remodelling within the actin  
964 cytoskeleton to drive robust *Drosophila* macrophage chemotaxis. *Journal of Cell Science*, 132(5).  
965 <https://doi.org/10.1242/jcs.224618>
- 966 Davidson, P.M., Denais, C., Bakshi, M., & Lammerding, J. (2014).. Nuclear deformability constitutes a rate-  
967 limiting step during cell migration in 3-D environments. *Cellular and Molecular Bioengineering*,  
968 7(3)293-306. <https://doi.org/10.1007/s12195-014-0342-y>
- 969 Davis, J. R., Luchici, A., Miodownik, M., Stramer, B. M., Davis, J. R., Luchici, A., ... Stramer, B. M. (2015).  
970 Inter-Cellular Forces Orchestrate Contact Inhibition of Locomotion Article Inter-Cellular Forces  
971 Orchestrate Contact Inhibition of Locomotion. *Cell*, 161(2), 361–373.  
972 <https://doi.org/10.1016/j.cell.2015.02.015>
- 973 Delaguillaumie, A., Lagaudrière-Gesbert, C., Popoff, M. R., & Conjeaud H., H. (2002). Rho GTPase link  
974 cytoskeletal rearrangements and activation processes induced via the tetraspanin CD82 in T lymphocytes.  
975 *Journal of Cell Science*, 115(2).
- 976 Deluca, T. F., Cui, J., Jung, J. Y., St. Gabriel, K. C., & Wall, D. P. (2012). Roundup 2.0: Enabling comparative

Belyaeva et al

- 977 genomics for over 1800 genomes. *Bioinformatics*, 28(5). <https://doi.org/10.1093/bioinformatics/bts006>
- 978 Dobin, A., Davis, C. A., Schlesinger, F., Drenkow, J., Zaleski, C., Jha, S., ... Gingeras, T. R. (2013). STAR:  
979 Ultrafast universal RNA-seq aligner. *Bioinformatics*, 29(1), 15–21.  
980 <https://doi.org/10.1093/bioinformatics/bts635>
- 981 Duffy, J. B. (2002). GAL4 system in *Drosophila*: A fly geneticist's Swiss army knife. *Genesis*, 34(1–2), 1–15.  
982 <https://doi.org/10.1002/gene.10150>
- 983 Edwards, K. A., Demsky, M., Montague, R. A., Weymouth, N., & Kiehart, D. P. (1997). GFP-moesin  
984 illuminates actin cytoskeleton dynamics in living tissue and demonstrates cell shape changes during  
985 morphogenesis in *Drosophila*. *Developmental Biology*, 191(1). <https://doi.org/10.1006/dbio.1997.8707>
- 986 Ehrlicher, A. J., Nakamura, F., Hartwig, J. H., Weitz, D. A., & Stossel, T. P. (2011). Mechanical strain in actin  
987 networks regulates FilGAP and integrin binding to filamin A. *Nature*, 478(7368), 260–263.  
988 <https://doi.org/10.1038/nature10430>
- 989 Eresh, S., Riese, J., Jackson, D. B., Bohmann, D., & Bienz, M. (1997). A CREB-binding site as a target for  
990 decapentaplegic signalling during *Drosophila* endoderm induction. *EMBO Journal*, 16(8), 2014–2022.  
991 <https://doi.org/10.1093/emboj/16.8.2014>
- 992 Evans, I. R., & Wood, W. (2011). *Drosophila* embryonic hemocytes. *Current Biology*, 21(5), R173–R174.  
993 <https://doi.org/10.1016/j.cub.2011.01.061>
- 994 Franck, Z., Gary, R., & Bretscher, A. (1993). Moesin, like ezrin, colocalizes with actin in the cortical  
995 cytoskeleton in cultured cells, but its expression is more variable. *Journal of Cell Science*, 105(1).
- 996 Fujita, M., Mitsuhashi, H., Isogai, S., Nakata, T., Kawakami, A., Nonaka, I., ... Kudo, A. (2012). Filamin C  
997 plays an essential role in the maintenance of the structural integrity of cardiac and skeletal muscles,  
998 revealed by the medaka mutant zacro. *Developmental Biology*, 361(1), 79–89.  
999 <https://doi.org/10.1016/j.ydbio.2011.10.008>
- 1000 García-Echeverría, C. Methionine-containing zipper peptides. *Lett Pept Sci* 4, 135–140 (1997).  
1001 <https://doi.org/10.1007/BF02443525>
- 1002 Ginhoux, F. & Williams, M. (2016). Tissue-resident macrophage ontogeny and homeostasis. *Immunity* 44(3),  
1003 439–449. <https://doi.org/10.1016/j.immuni.2016.02.024>
- 1004 Glogauer, M., Arora, P., Chou, D., Janmey, P. A., Downey, G. P., & McCulloch, C. A. G. (1998). The role of  
1005 actin-binding protein 280 in integrin-dependent mechanoprotection. *Journal of Biological Chemistry*,  
1006 273(3), 1689–1698. <https://doi.org/10.1074/jbc.273.3.1689>

Belyaeva et al

- 1007 Glover, J.N.M. and Harrison, S.C. (1005). Crystal structure of the heterodimeric bZIP transcription factor c-Fos-  
1008 c-Jun bound to DNA. *Nature*, 373(6511):257-261. <https://doi.org/10.1038/373257a0>
- 1009 Goldmann, W. H., Tempel, M., Sprenger, I., Isenberg, G., & Ezzell, R. M. (1997). Viscoelasticity of actin-  
1010 gelsolin networks in the presence of filamin. *European Journal of Biochemistry*, 246(2), 373–379.  
1011 <https://doi.org/10.1111/j.1432-1033.1997.00373.x>
- 1012 Gonzalez-Gaitan, M. & Peifer, M. (2009) Exploring the roles of Diaphanous and Enabled activity in shaping the  
1013 balance between filopodia and lamellipodia. *Molecular Biology of the Cell* 20(24).  
1014 <https://doi.org/10.1091/mbc.e09-02-0144>
- 1015 Greten, F.R. & Grovannikov, S.I. (2019). Inflammation and Cancer: Triggers, Mechanisms and Consequences.  
1016 *Immunity* 51(1), 27-41. <https://doi.org/10.1016/j.immuni.2019.06.025>
- 1017 Großhans, J., Wenzl, C., Herz, H. M., Bartoszewski, S., Schnorrer, F., Vogt, N., ... Müller, H. A. (2005).  
1018 RhoGEF2 and the formin Dia control the formation of the furrow canal by directed actin assembly during  
1019 Drosophila cellularisation. *Development*, 132(5), 1009–1020. <https://doi.org/10.1242/dev.01669>
- 1020 Guilliams, M., Thierry, G.R., Bonnardel, J., & Bajenoff, M. (2020). Establishment and Maintenance of the  
1021 Macrophage Niche. *Immunity* 52(3), 434-451. <https://doi.org/10.1016/j.immuni.2020.02.015>
- 1022 Gyoergy, A., Roblek, M., Ratheesh, A., Valoskova, K., Belyaeva, V., Wachner, S., ... Siekhaus, D. E. (2018).  
1023 Tools allowing independent visualization and genetic manipulation of Drosophila melanogaster  
1024 macrophages and surrounding tissues. *G3: Genes, Genomes, Genetics*, 8(3).  
1025 <https://doi.org/10.1534/g3.117.300452>
- 1026 Hammonds, A. A. S., Bristow, C. C. a, Fisher, W. W., Weiszmann, R., Wu, S., Hartenstein, V., ... Celniker, S.  
1027 E. (2013). Spatial expression of transcription factors in Drosophila embryonic organ development.  
1028 *Genome Biology*, 14(12), R140. <https://doi.org/10.1186/gb-2013-14-12-r140>
- 1029 Harada, T., Swift, J., Irianto, J., Shin, J, Spinler, K.R., Athirasala, A., Diegmiller, R., Dingal, P.C.D.P.,  
1030 Ivanovska, I.L., & Discher, D.E. (2014). Nuclear lamin stiffness is a barrier to 3D migration, but softness  
1031 can limit survival. *J. Cell Biology*, 2014(5)669-82. <https://doi.org/10.1083/jcb.201308029>.
- 1032 Heer, N. C., & Martin, A. C. (2017). Tension, contraction and tissue morphogenesis. *Development (Cambridge)*,  
1033 144(23). <https://doi.org/10.1242/dev.151282>
- 1034 Holz, A., Bossinger, B., Strasser, T., Janning, W., & Klapper, R. (2003). The two origins of hemocytes in  
1035 *Drosophila*. *Development*, 130(20), 4955-62. <https://doi.org/10.1242/dev.007202>
- 1036 Hong, I. K., Jeoung, D. Il, Ha, K. S., Kim, Y. M., & Lee, H. (2012). Tetraspanin CD151 stimulates adhesion-



Belyaeva et al

- 1037 dependent activation of Ras, Rac, and Cdc42 by facilitating molecular association between  $\beta 1$  integrins  
1038 and small GTPases. *Journal of Biological Chemistry*, 287(38), 32027–32039.  
1039 <https://doi.org/10.1074/jbc.M111.314443>
- 1040 Hu, J., Lu, J., Lian, G., Ferland, R. J., Dettenhofer, M., & Sheen, V. L. (2014). Formin 1 and filamin B  
1041 physically interact to coordinate chondrocyte proliferation and differentiation in the growth plate. *Human*  
1042 *Molecular Genetics*, 23(17), 4663–4673. <https://doi.org/10.1093/hmg/ddu186>
- 1043 Kasza, K. E., Broedersz, C. P., Koenderink, G. H., Lin, Y. C., Messner, W., Millman, E. A., ... Weitz, D. A.  
1044 (2010). Actin filament length tunes elasticity of flexibly cross-linked actin networks. *Biophysical Journal*,  
1045 99(4), 1091–1100. <https://doi.org/10.1016/j.bpj.2010.06.025>
- 1046 Kessenbrock, K., Plaks, V., & Werb, Z. (2010). Matrix metalloproteinases: regulators of the tumor  
1047 microenvironment. *Cell* 141(1), 52-67. <https://doi.org/10.1016/j.cell.2010.03.015>
- 1048 Kühn, S., & Geyer, M. (2014). Formins as effector proteins of rho GTPases. *Small GTPases*, 5(JUNE).  
1049 <https://doi.org/10.4161/sgtp.29513>
- 1050 Külshammer, E., Mundorf, J., Kilinc, M., Frommolt, P., Wagle, P., & Uhlirova, M. (2015). Interplay among  
1051 Drosophila transcription factors Ets21c, Fos and Ftz-F1 drives JNK-mediated tumor malignancy. *DMM*  
1052 *Disease Models and Mechanisms*, 8(10), 1279–1293. <https://doi.org/10.1242/dmm.020719>
- 1053 Külshammer, E., & Uhlirova, M. (2013). The actin cross-linker Filamin/Cheerio mediates tumor malignancy  
1054 downstream of JNK signaling. *Journal of Cell Science*, 126(4), 927–938.  
1055 <https://doi.org/10.1242/jcs.114462>
- 1056 Kumar, A., Shutova, M. S., Tanaka, K., Iwamoto, D. V., Calderwood, D. A., Svitkina, T. M., & Schwartz, M.  
1057 A. (2019). Filamin A mediates isotropic distribution of applied force across the actin network. *Journal of*  
1058 *Cell Biology*, 218(8), 2481–2491. <https://doi.org/10.1083/jcb.201901086>
- 1059 Lehmann, R., & Tautz, D. (1994). In Situ Hybridization to RNA. *Methods in Cell Biology*, 44(C), 575–596.  
1060 [https://doi.org/10.1016/S0091-679X\(08\)60933-4](https://doi.org/10.1016/S0091-679X(08)60933-4)
- 1061 Lemaitre, B., & Hoffmann, J. (2007). The Host Defense of *Drosophila melanogaster*. *Annual Review of*  
1062 *Immunology*, 25(1), 697–743. <https://doi.org/10.1146/annurev.immunol.25.022106.141615>
- 1063 Lesch, C., Jo, J., Wu, Y., Fish, G. S., & Galko, M. J. (2010). A Targeted *UAS-RNAi* Screen in *Drosophila*  
1064 Larvae Identifies Wound Closure Genes Regulating Distinct Cellular Processes. *Genetics*, 186(3), 943–  
1065 957. <https://doi.org/10.1534/genetics.110.121822>
- 1066 Lian, G., Dettenhofer, M., Lu, J., Downing, M., Chenn, A., Wong, T., & Sheen, V. (2016). Filamin A- and

Belyaeva et al

- 1067 formin 2-dependent endocytosis regulates proliferation via the canonical wnt pathway. *Development*  
1068 (*Cambridge*), 143(23). <https://doi.org/10.1242/dev.139295>
- 1069 Linder, M., Glitzner, E., Srivatsa, S., Bakiri, L., Matsuoka, K., Shahrouzi, P., ... Sibilias, M. (2018). EGFR is  
1070 required for FOS-dependent bone tumor development via RSK2/CREB signaling. *EMBO Molecular*  
1071 *Medicine*, 10(11). <https://doi.org/10.15252/emmm.201809408>
- 1072 Luster, A. D., Alon, R., & von Andrian, U. H. (2005). Immune cell migration in inflammation: Present and  
1073 future therapeutic targets. *Nature Immunology*, 6(12), 1182–1190. <https://doi.org/10.1038/ni1275>
- 1074 Makhijani, K., Alexander, B., Tanaka, T., Rulfson, E., & Brückner, K. (2011). The peripheral nervous system  
1075 supports blood cell homing and survival in the *Drosophila* larva. *Development*, 138(24), 5379-91.  
1076 <https://doi.org/10.1242/dev.067322>
- 1077 Matsubayashi, Y., Louani, A., Dragu, A., Sánchez-Sánchez, B. J., Serna-Morales, E., Yolland, L., ... Stramer,  
1078 B. M. (2017). A Moving Source of Matrix Components Is Essential for De Novo Basement Membrane  
1079 Formation. *Current Biology*, 27(22), 3526-3534.e4. <https://doi.org/10.1016/j.cub.2017.10.001>
- 1080 Min, P. I., Spurney, R. F., Qisheng, T. U., Hinson, T., & Darryl Quarles, L. (2002). Calcium-sensing receptor  
1081 activation of Rho involves filamin and rho-guanine nucleotide exchange factor. *Endocrinology*, 143(10),  
1082 3830–3838. <https://doi.org/10.1210/en.2002-220240>
- 1083 Mitchison, T.J., and Cramer, L.P. (1996) Actin-based cell motility and cell locomotion. *Cell* 84(3)371-9).  
1084 [https://doi.org/10.1016/s0092-8864\(00\)81281-7](https://doi.org/10.1016/s0092-8864(00)81281-7).
- 1085 Muñoz-Alarcón, A., Pavlovic, M., Wismar, J., Schmitt, B., Eriksson, M., Kylsten, P., & Dushay, M. S. (2007).  
1086 Characterization of lamin mutation phenotypes in *Drosophila* and comparison to human laminopathies.  
1087 *PloS One*, 2(6). <https://doi.org/10.1371/journal.pone.0000532>
- 1088 Ohta, Y., Suzuki, N., Nakamura, S., Hartwig, J. H., & Stossel, T. P. (1999). The small GTPase Ra1A targets  
1089 filamin to induce filopodia. *Proceedings of the National Academy of Sciences of the United States of*  
1090 *America*, 96(5), 2122–2128. <https://doi.org/10.1073/pnas.96.5.2122>
- 1091 Paluch, E. K., Aspalter, I. M., & Sixt, M. (2016). Focal Adhesion–Independent Cell Migration. *Annual Review*  
1092 *of Cell and Developmental Biology*, 32(1), 469–490. <https://doi.org/10.1146/annurev-cellbio-111315-125341>
- 1094 Perez-Hernandez, D., Gutiérrez-Vázquez, C., Jorge, I., López-Martín, S., Ursa, A., Sánchez-Madrid, F., ...  
1095 Yañez-Mó, M. (2013). The intracellular interactome of tetraspanin-enriched microdomains reveals their  
1096 function as sorting machineries toward exosomes. *Journal of Biological Chemistry*, 288(17), 11649–

Belyaeva et al

- 1097 11661. <https://doi.org/10.1074/jbc.M112.445304>
- 1098 Perkins, L. A., Holderbaum, L., Tao, R., Hu, Y., Sopko, R., McCall, K., ... Perrimon, N. (2015). The transgenic  
1099 RNAi project at Harvard medical school: Resources and validation. *Genetics*, *201*(3), 843–852.  
1100 <https://doi.org/10.1534/genetics.115.180208>
- 1101 Popowicz, G. M., Schleicher, M., Noegel, A. A., & Holak, T. A. (2006). Filamins: promiscuous organizers of  
1102 the cytoskeleton. *Trends in Biochemical Sciences*, *31*(7), 411–419.  
1103 <https://doi.org/10.1016/j.tibs.2006.05.006>
- 1104 Raab, M., Gentili, M., de Belly, H., Thiam, H.R., Vargas, P., Jimenez, A.J., Lautenschlaeger, F., Voituriez, R.,  
1105 Lennon-Duménil, A.M., Manel, N, Piel, M. (2016). ESCRT III repairs nuclear envelope ruptures during  
1106 cell migration to limit DNA damage and cell death. *Science*, *352*(6283), 359-62.  
1107 <https://doi.org/10.1126/science.aad7611>
- 1108 Ratheesh, A., Belyaeva, V., & Siekhaus, D. E. (2015). Drosophila immune cell migration and adhesion during  
1109 embryonic development and larval immune responses. *Current Opinion in Cell Biology*, *36*, 71–79.  
1110 <https://doi.org/10.1016/j.ceb.2015.07.003>
- 1111 Ratheesh, A., Biebl, J., Vesela, J., Smutny, M., Papusheva, E., Krens, S. F. G., ... Siekhaus, D. E. (2018).  
1112 Drosophila TNF Modulates Tissue Tension in the Embryo to Facilitate Macrophage Invasive Migration.  
1113 *Developmental Cell*, *45*(3), 331-346.e7. <https://doi.org/10.1016/j.devcel.2018.04.002>
- 1114 Razinia, Z., Mäkelä, T., Yläanne, J., & Calderwood, D. A. (2012). Filamins in Mechanosensing and Signaling.  
1115 *Annual Review of Biophysics*, *41*(1), 227–246. <https://doi.org/10.1146/annurev-biophys-050511-102252>
- 1116 Riesgo-Escovar, J. R., & Hafen, E. (1997). Common and distinct roles of DFos and DJun during Drosophila  
1117 development. *Science (New York, N.Y.)*, *278*(5338), 669–672.  
1118 <https://doi.org/10.1126/science.278.5338.669>
- 1119 Riveline, D., Zamir, E., Balaban, N. Q., Schwarz, U. S., Ishizaki, T., Narumiya, S., ... Bershadsky, A. D.  
1120 (2001). Focal contacts as mechanosensors: Externally applied local mechanical force induces growth of  
1121 focal contacts by an mDia1-dependent and ROCK-independent mechanism. *Journal of Cell Biology*,  
1122 *153*(6), 1175–1185. <https://doi.org/10.1083/jcb.153.6.1175>
- 1123 Rose, R., Weyand, M., Lammers, M., Ishizaki, T., Ahmadian, M. R., & Wittinghofer, A. (2005). Structural and  
1124 mechanistic insights into the interaction between Rho and mammalian Dia. *Nature*, *435*(7041), 513–518.  
1125 <https://doi.org/10.1038/nature03604>
- 1126 Rousso, T., Shewan, A. M., Mostov, K. E., Schejter, E. D., & Shilo, B. Z. (2013). Apical targeting of the formin

Belyaeva et al

- 1127 diaphanous in *Drosophila* tubular epithelia. *ELife*, 2013(2). <https://doi.org/10.7554/eLife.00666>
- 1128 Sánchez-Sánchez, B. J., Urbano, J. M., Comber, K., Dragu, A., Wood, W., Stramer, B., & Martín-Bermudo, M.  
1129 D. (2017). *Drosophila* Embryonic Hemocytes Produce Laminins to Strengthen Migratory Response. *Cell*  
1130 *Reports*, 21(6), 1461–1470. <https://doi.org/10.1016/j.celrep.2017.10.047>
- 1131 Seth, A., Otomo, C., & Rosen, M. K. (2006). Autoinhibition regulates cellular localization and actin assembly  
1132 activity of the diaphanous-related formins FRL $\alpha$  and mDia1. *Journal of Cell Biology*, 174(5), 701–713.  
1133 <https://doi.org/10.1083/jcb.200605006>
- 1134 Sharma, P. & Allison, J.P. (2015) The future of immune checkpoint therapy. *Science* 348(6230), 56-61.  
1135 <https://doi.org/10.1126/science.aaa8172>.
- 1136 Shigeta, M., Sanzen, N., Ozawa, M., Gu, J., Hasegawa, H., & Sekiguchi, K. (2003). CD151 regulates epithelial  
1137 cell-cell adhesion through PKC- and Cdc42-dependent actin cytoskeletal reorganization. *Journal of Cell*  
1138 *Biology*, 163(1), 165–176. <https://doi.org/10.1083/jcb.200301075>
- 1139 Siekhaus, D., Haesemeyer, M., Moffitt, O., & Lehmann, R. (2010). RhoL controls invasion and Rap1  
1140 localization during immune cell transmigration in *Drosophila*. *Nature Cell Biology*, 12(6), 605–610.  
1141 <https://doi.org/10.1038/ncb2063>
- 1142 Sit, S. T., & Manser, E. (2011). Rho GTPases and their role in organizing the actin cytoskeleton. *Journal of Cell*  
1143 *Science*, 124(5), 679–683. <https://doi.org/10.1242/jcs.064964>
- 1144 Smutny, M., Ákos, Z., Grigolon, S., Shamipour, S., Ruprecht, V., Čapek, D., ... Heisenberg, C. P. (2017).  
1145 Friction forces position the neural anlage. *Nature Cell Biology*, 19(4), 306–317.  
1146 <https://doi.org/10.1038/ncb3492>
- 1147 Sokol, N. S., & Cooley, L. (2003). *Drosophila* filamin is required for follicle cell motility during oogenesis.  
1148 *Developmental Biology*, 260(1), 260–272. [https://doi.org/10.1016/S0012-1606\(03\)00248-3](https://doi.org/10.1016/S0012-1606(03)00248-3)
- 1149 Somogyi, K., & Rørth, P. (2004). Evidence for tension-based regulation of *Drosophila* MAL and SRF during  
1150 invasive cell migration. *Developmental Cell*, 7(1), 85–93. <https://doi.org/10.1016/j.devcel.2004.05.020>
- 1151 Stossel, T. P., Condeelis, J., Cooley, L., Hartwig, J. H., Noegel, A., Schleicher, M., & Shapiro, S. S. (2001).  
1152 Filamins as integrators of cell mechanics and signalling. *Nature Reviews Molecular Cell Biology*, 2(2),  
1153 138–145. <https://doi.org/10.1038/35052082>
- 1154 Szabo, P.A., Miron, M., & Farber, D.L. (2019). Location, location, location: Tissue residence memory T cells in  
1155 mice and humans. *Science Immunology* 4(34), <https://doi.org/10.1126/sciimmunol.aas9673>
- 1156 Szalóki, N., Krieger, J. W., Komáromi, I., Tóth, K., & Vámosi, G. (2015). Evidence for Homodimerization of

Belyaeva et al

- 1157 the c-Fos Transcription Factor in Live Cells Revealed by Fluorescence Microscopy and Computer  
1158 Modeling. *Molecular and Cellular Biology*, 35(21). <https://doi.org/10.1128/mcb.00346-15>
- 1159 Tejera, E., Rocha-Perugini, V., López-Martín, S., Pérez-Hernández, D., Bachir, A. I., Horwitz, A. R., ... Yáñez-  
1160 Mo, M. (2013). CD81 regulates cell migration through its association with Rac GTPase. *Molecular*  
1161 *Biology of the Cell*, 24(3), 261–273. <https://doi.org/10.1091/mbc.E12-09-0642>
- 1162 Termini, C. M., & Gillette, J. M. (2017). Tetraspanins Function as Regulators of Cellular Signaling. *Frontiers in*  
1163 *Cell and Developmental Biology*, 5, 34. <https://doi.org/10.3389/fcell.2017.00034>
- 1164 Theret, M., Mounier, R., & Rossi, F. (2019). The origins and non-canonical functions of macrophages in  
1165 development and regeneration. *Development*, 146(9). <https://doi.org/10.1242/dev.156000>
- 1166 Thiam, H., Vargas, P., Carpi, N., Crespo, C.L., Raab, M., Terriac, E., King, M.C., Jacobelli, J., Alberts, A.S.,  
1167 Stradal, T., Lennon-Dumenil, A., Piel, M. (2016). Perinuclear Arp2/3-driven actin polymerization enables  
1168 nuclear deformation to facilitate cell migration through complex environments. *Stremmel*:10997,  
1169 <https://doi.org/10.1038/ncomms10997>
- 1170 Thurmond, J., Goodman, J. L., Strelets, V. B., Attrill, H., Gramates, L. S., Marygold, S. J., ... Baker, P. (2019).  
1171 FlyBase 2.0: The next generation. *Nucleic Acids Research*, 47(D1). <https://doi.org/10.1093/nar/gky1003>
- 1172 Tomancak, P., Beaton, A., Weiszmam, R., Kwan, E., Shu, S. Q., Lewis, S. E., ... Rubin, G. M. (2002).  
1173 Systematic determination of patterns of gene expression during Drosophila embryogenesis. *Genome*  
1174 *Biology*, 3(12). <https://doi.org/10.1186/gb-2002-3-12-research0088>
- 1175 Tomancak, P., Berman, B. P., Beaton, A., Weiszmam, R., Kwan, E., Hartenstein, V., ... Rubin, G. M. (2007).  
1176 Global analysis of patterns of gene expression during Drosophila embryogenesis. *Genome Biology*, 8(7).  
1177 <https://doi.org/10.1186/gb-2007-8-7-r145>
- 1178 Tseng, Y., An, K. M., Esue, O., & Wirtz, D. (2004). The Bimodal Role of Filamin in Controlling the  
1179 Architecture and Mechanics of F-actin Networks. *Journal of Biological Chemistry*, 279(3), 1819–1826.  
1180 <https://doi.org/10.1074/jbc.M306090200>
- 1181 Uhlirova, M., & Bohmann, D. (2006). JNK- and Fos-regulated Mmp1 expression cooperates with Ras to induce  
1182 invasive tumors in Drosophila. *EMBO Journal*, 25(22), 5294–5304.  
1183 <https://doi.org/10.1038/sj.emboj.7601401>
- 1184 Vadlamudi, R. K., Li, F., Adam, L., Nguyen, D., Ohta, Y., Stossel, T. P., & Kumar, R. (2002). Filamin is  
1185 essential in actin cytoskeletal assembly mediated by p21-activated kinase 1. *Nature Cell Biology*, 4(9),  
1186 681–690. <https://doi.org/10.1038/ncb838>

Belyaeva et al

- 1187 Valoskova, K., Biebl, J., Roblek, M., Emtenani, S., Gyoergy, A., Misova, M., ... Siekhaus, D. E. (2019). A  
1188 conserved major facilitator superfamily member orchestrates a subset of O-glycosylation to aid  
1189 macrophage tissue invasion. *ELife*, 8. <https://doi.org/10.7554/eLife.41801>
- 1190 Vetter, I.R., & Wittinghofer, A. (2001). The guanine nucleotide-binding switch in three dimensions. *Science*  
1191 294(5545),1299-1304. <https://doi.org/10.1126/science.1062023>
- 1192 Warner, S. J., & Longmore, G. D. (2009). Cdc42 antagonizes Rho1 activity at adherens junctions to limit  
1193 epithelial cell apical tension. *Journal of Cell Biology*, 187(1), 119–133.  
1194 <https://doi.org/10.1083/jcb.200906047>
- 1195 Weavers, H., Evans, I. R., Martin, P., & Wood, W. (2016). Corpse Engulfment Generates a Molecular Memory  
1196 that Primes the Macrophage Inflammatory Response. *Cell*. <https://doi.org/10.1016/j.cell.2016.04.049>
- 1197 Williams, M. J., Habayeb, M. S., & Hultmark, D. (2007). Reciprocal regulation of Rac1 and Rho1 in Drosophila  
1198 circulating immune surveillance cells. *Journal of Cell Science*, 120(3), 502–511.  
1199 <https://doi.org/10.1242/jcs.03341>
- 1200 Wintner, O., Hirsch-Attas, N., Schlossberg, M., Brofman, F., Friedman, R., Kupervaser, M., ... Buxboim, A.  
1201 (2020). A Unified Linear Viscoelastic Model of the Cell Nucleus Defines the Mechanical Contributions of  
1202 Lamins and Chromatin. *Advanced Science*, 7(8). <https://doi.org/10.1002/advs.201901222>
- 1203 Wood, W., Faria, C., & Jacinto, A. (2006). Distinct mechanisms regulate hemocyte chemotaxis during  
1204 development and wound healing in *Drosophila melanogaster*. *Journal of Cell Biology*, 173(3).  
1205 <https://doi.org/10.1083/jcb.200508161>
- 1206 Yáñez-Mó, M., Barreiro, O., Gordon-Alonso, M., Sala-Valdés, M., & Sánchez-Madrid, F. (2009). Tetraspanin-  
1207 enriched microdomains: a functional unit in cell plasma membranes. *Trends in Cell Biology*, 19(9), 434–  
1208 446. <https://doi.org/10.1016/j.tcb.2009.06.004>
- 1209 Yeung, L., Hickey, M.J., & Wright, M.D. (2018) The many and varied roles of tetraspanins in immune cell  
1210 recruitment and migration. *Frontiers in Immunology*.9:1644 .[https:// doi: 10.3389/fimmu.2018.01644](https://doi.org/10.3389/fimmu.2018.01644).
- 1211 Zeitlinger, J., Kockel, L., Peverali, F. A., Jackson, D. B., Mlodzik, M., & Bohmann, D. (1997). Defective dorsal  
1212 closure and loss of epidermal decapentaplegic expression in *Drosophila fos* mutants. *EMBO Journal*,  
1213 16(24), 7393–7401. <https://doi.org/10.1093/emboj/16.24.7393>
- 1214 Zhang, X. A., Bontrager, A. L., & Hemler, M. E. (2001). Transmembrane-4 Superfamily Proteins Associate  
1215 with Activated Protein Kinase C (PKC) and Link PKC to Specific  $\beta$ 1 Integrins. *Journal of Biological*  
1216 *Chemistry*, 276(27), 25005–25013. <https://doi.org/10.1074/jbc.M102156200>

Belyaeva et al

- 1217 Zhou, J., Kim, H. Y., & Davidson, L. A. (2009). Actomyosin stiffens the vertebrate embryo during crucial  
1218 stages of elongation and neural tube closure. *Development*, 136(4), 677–688.  
1219 <https://doi.org/10.1242/dev.026211>
- 1220 Zimmerman, B., Kelly, B., McMillan, B. J., Seegar, T. C. M., Dror, R. O., Kruse, A. C., & Blacklow, S. C.  
1221 (2016). Crystal Structure of a Full-Length Human Tetraspanin Reveals a Cholesterol-Binding Pocket.  
1222 *Cell*, 167(4). <https://doi.org/10.1016/j.cell.2016.09.056>
- 1223 Zimmerman, B., Kelly, B., McMillan, B., Seegar, T., Kruse, A., & Blacklow, S. (2016). Crystal Structure of  
1224 Human Tetraspanin CD81 Reveals a Conserved Intramembrane Binding Cavity. *Cell*, 167(4), 1041–1051.  
1225 <https://doi.org/10.1016/j.cell.2016.09.056>
- 1226 Zwerger, M., Jaalouk, D. E., Lombardi, M. L., Isermann, P., Mauermann, M., Dialynas, G., ... Lammerding, J.  
1227 (2013). Myopathic lamin mutations impair nuclear stability in cells and tissue and disrupt nucleo-  
1228 cytoskeletal coupling. *Human Molecular Genetics*, 22(12), 2335–2349. <https://doi.org/10.109>  
1229

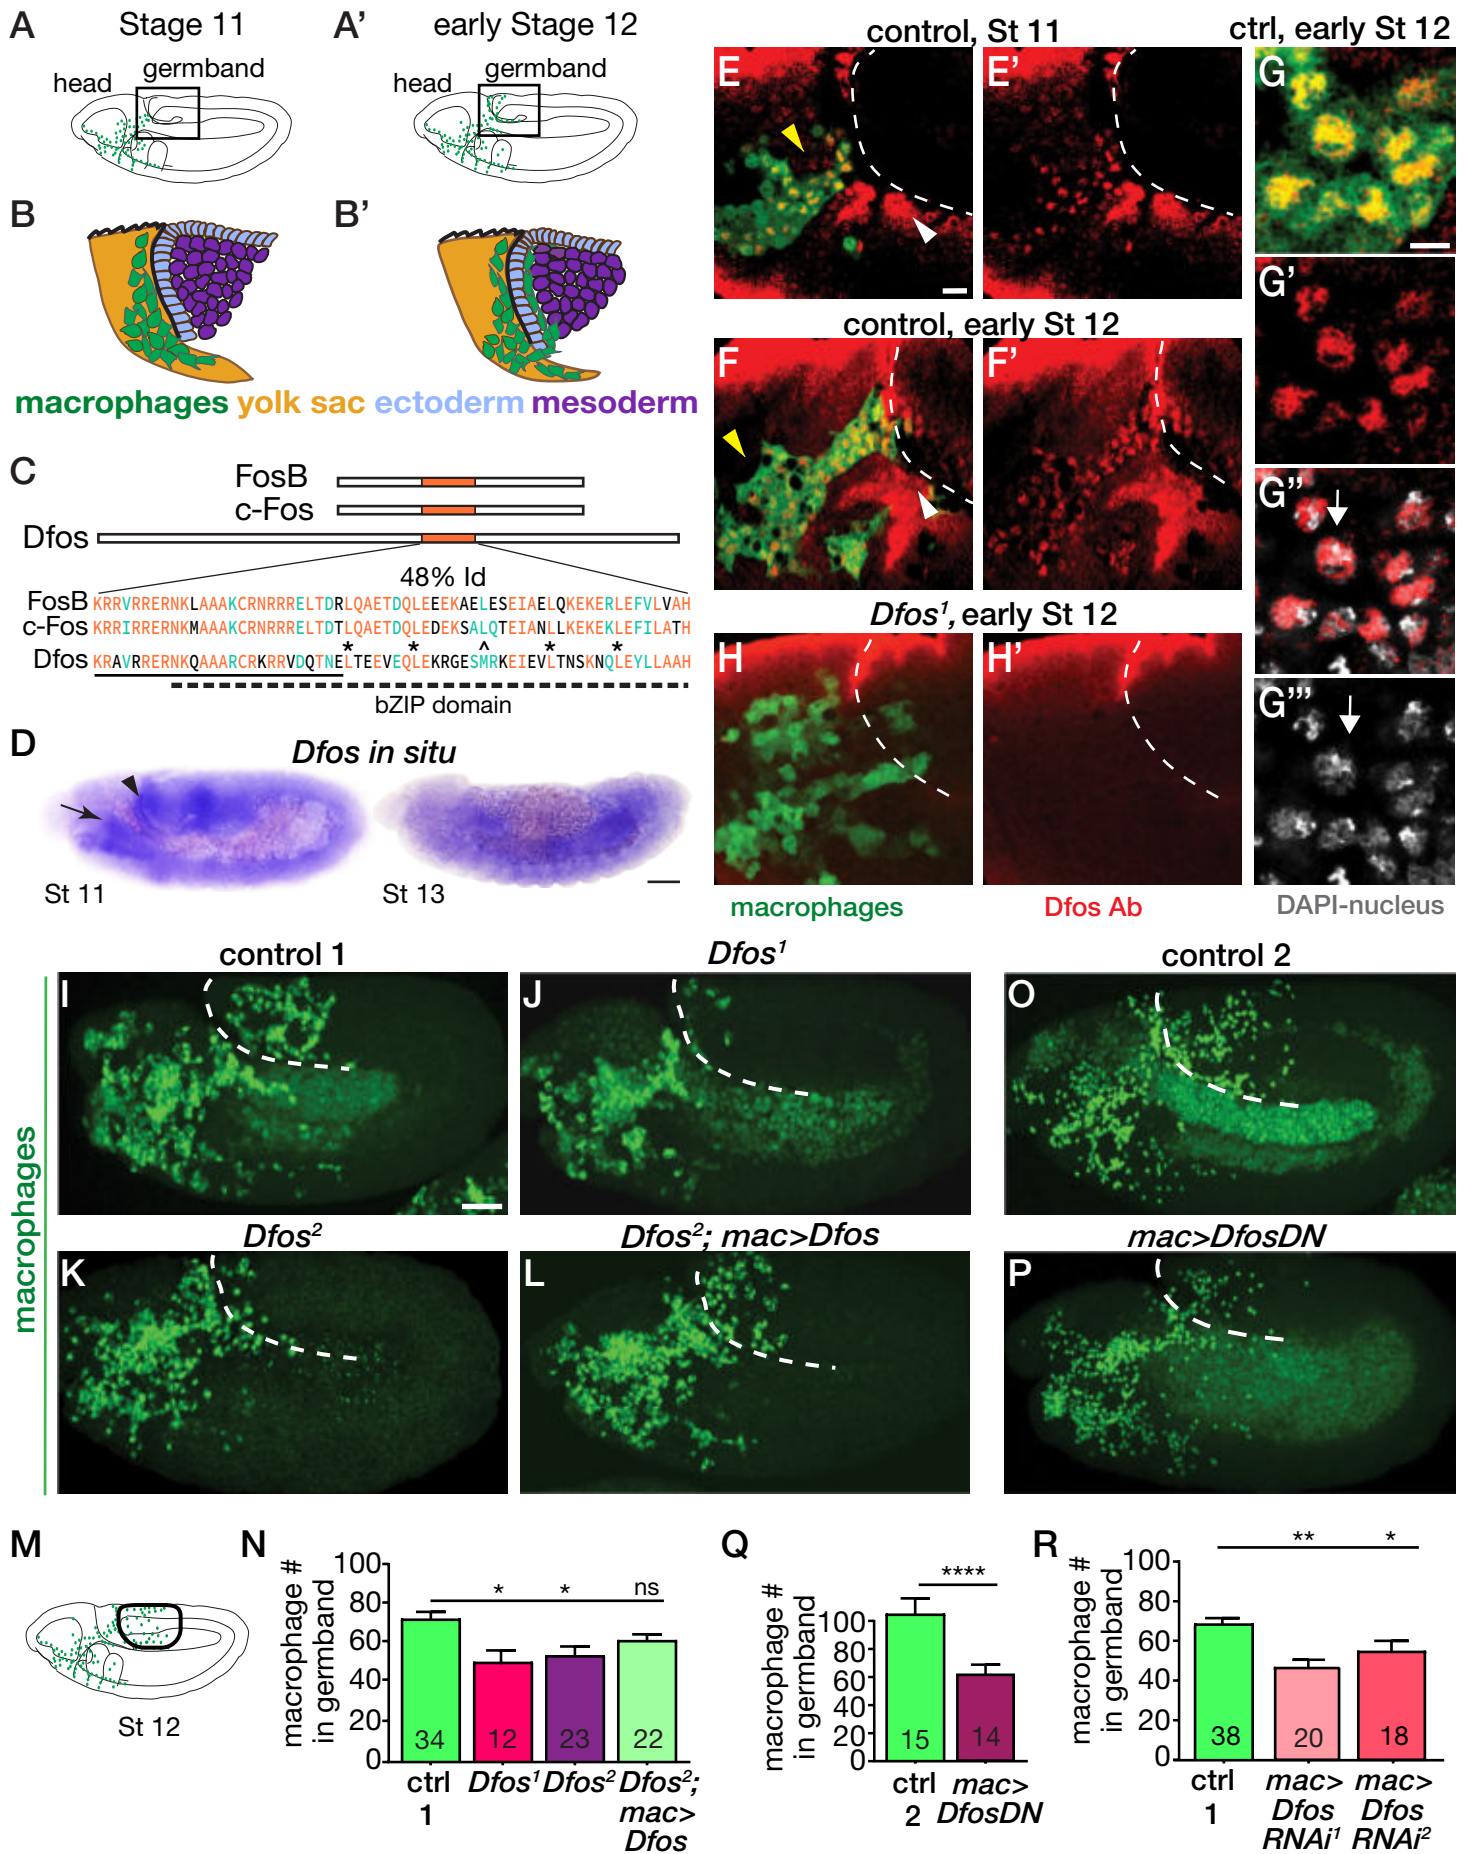



Belvaeva et al. Figure 2

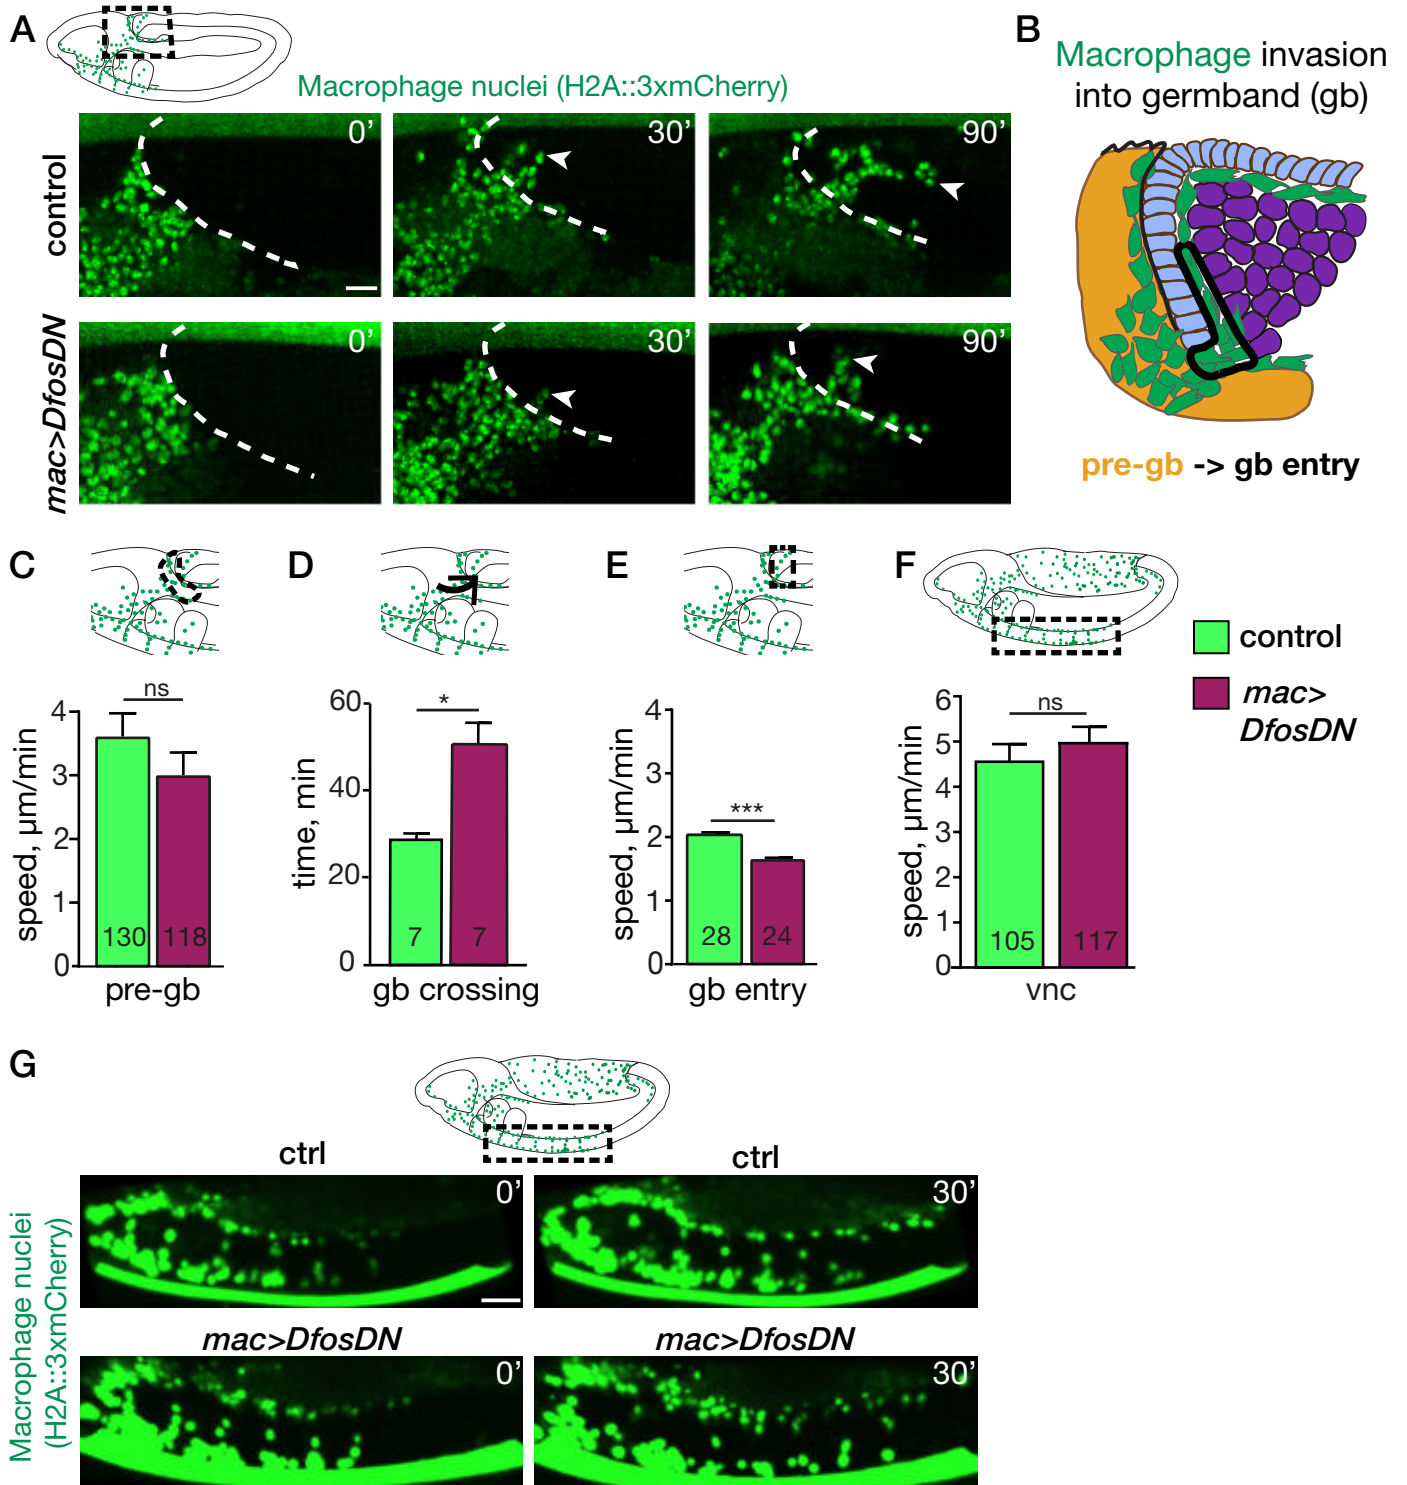

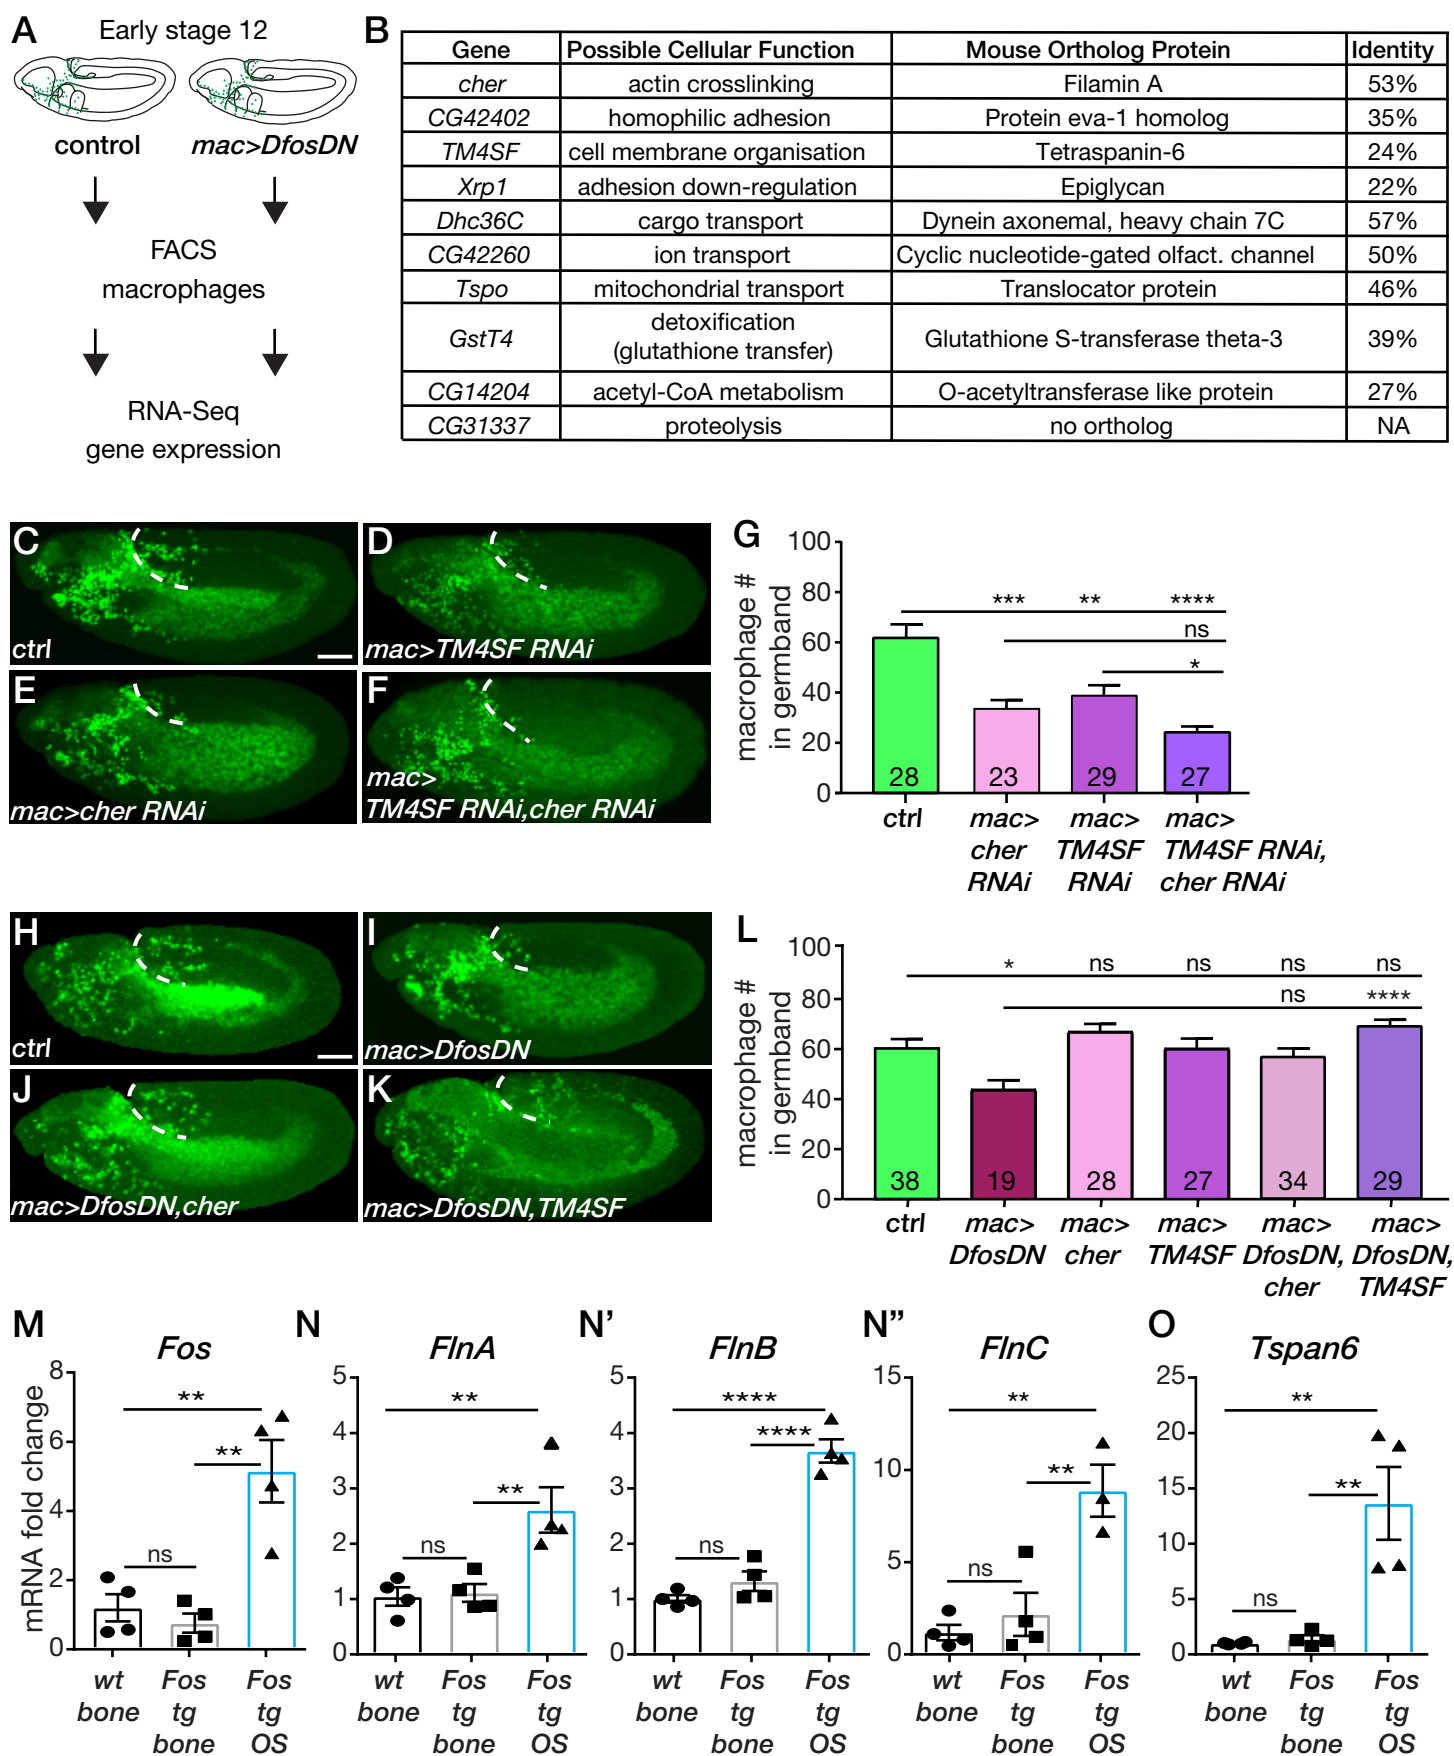

## Belyaeva et al, Figure 4

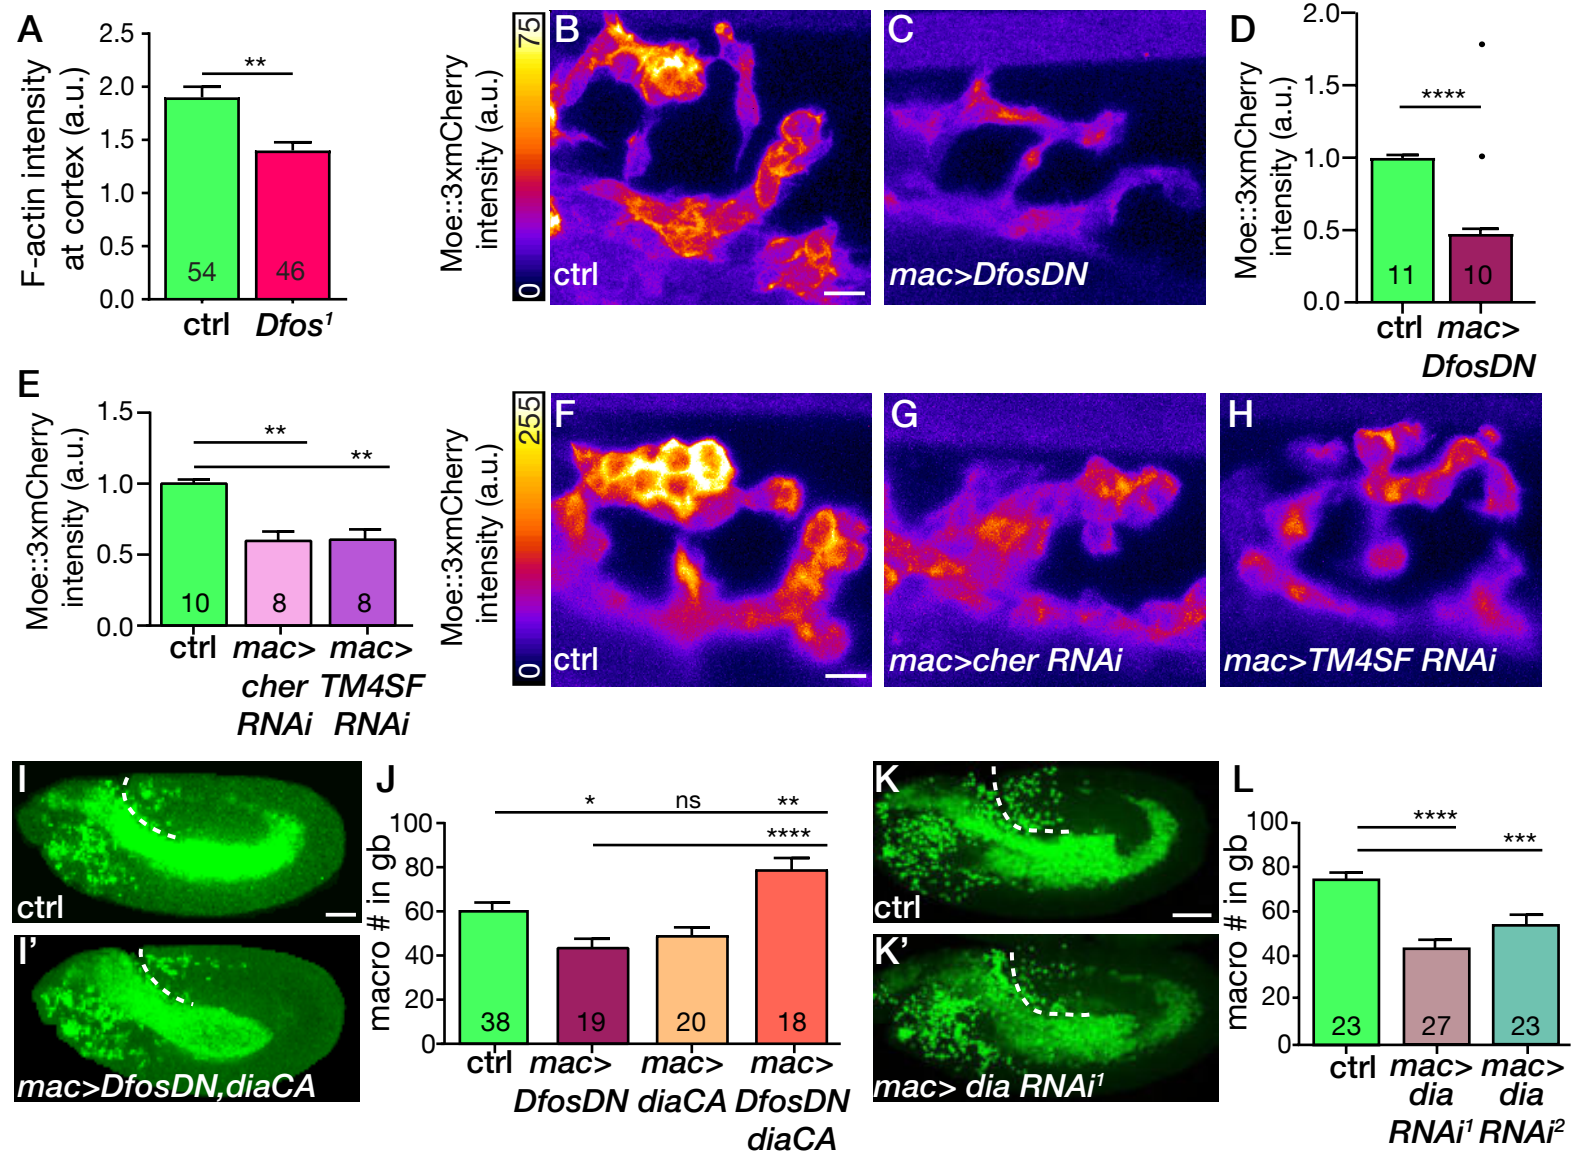

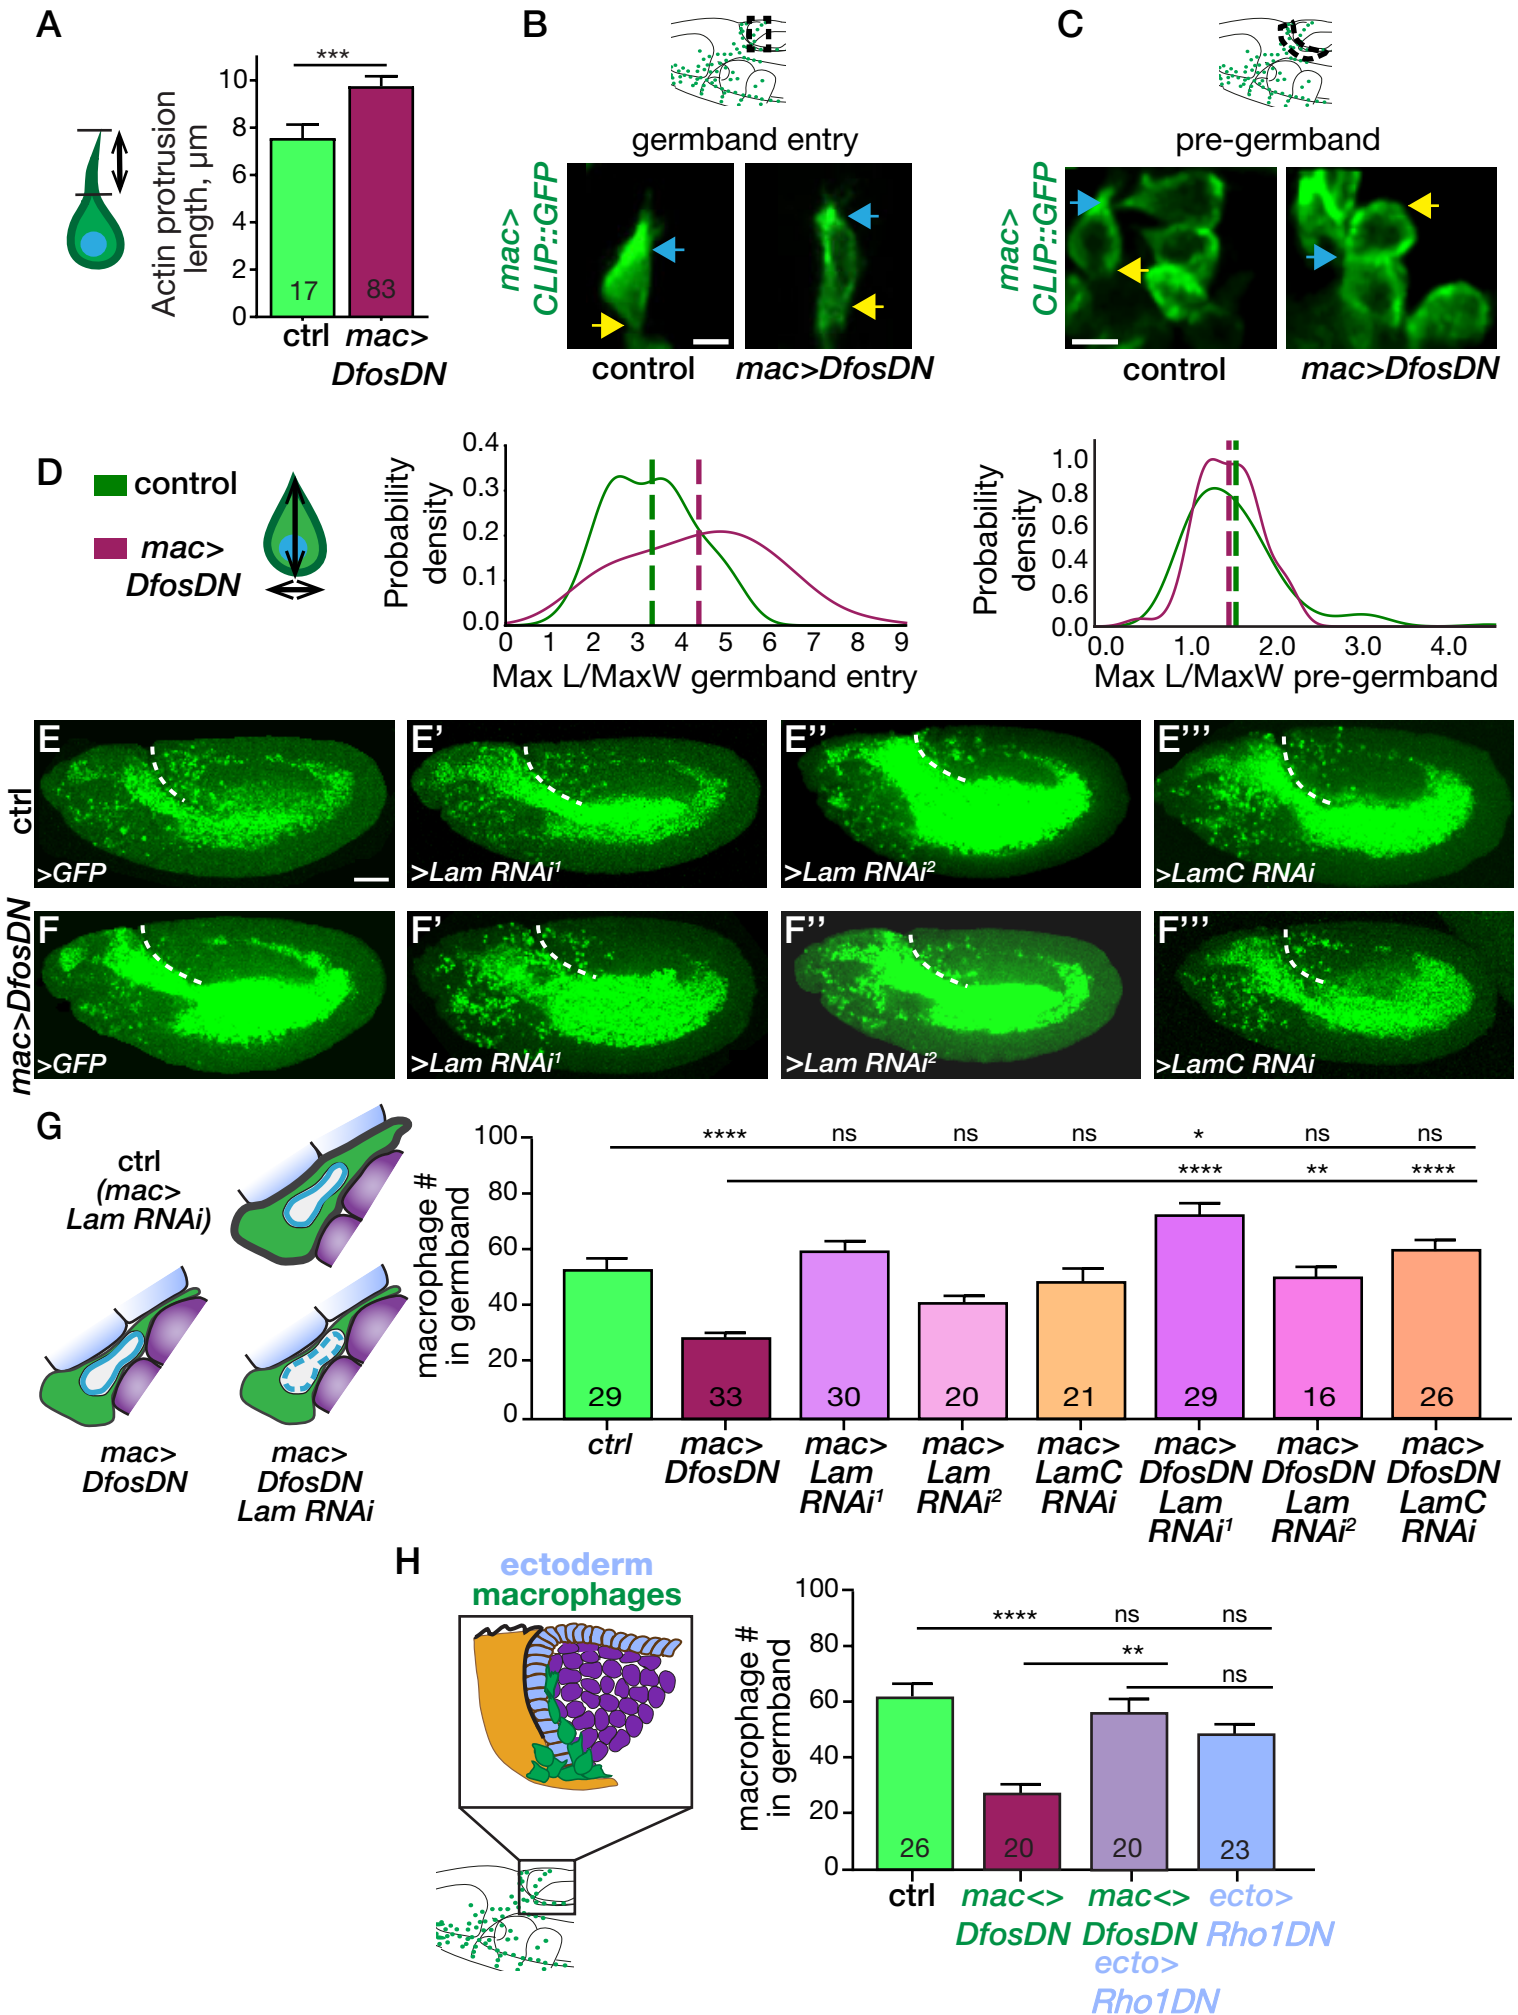

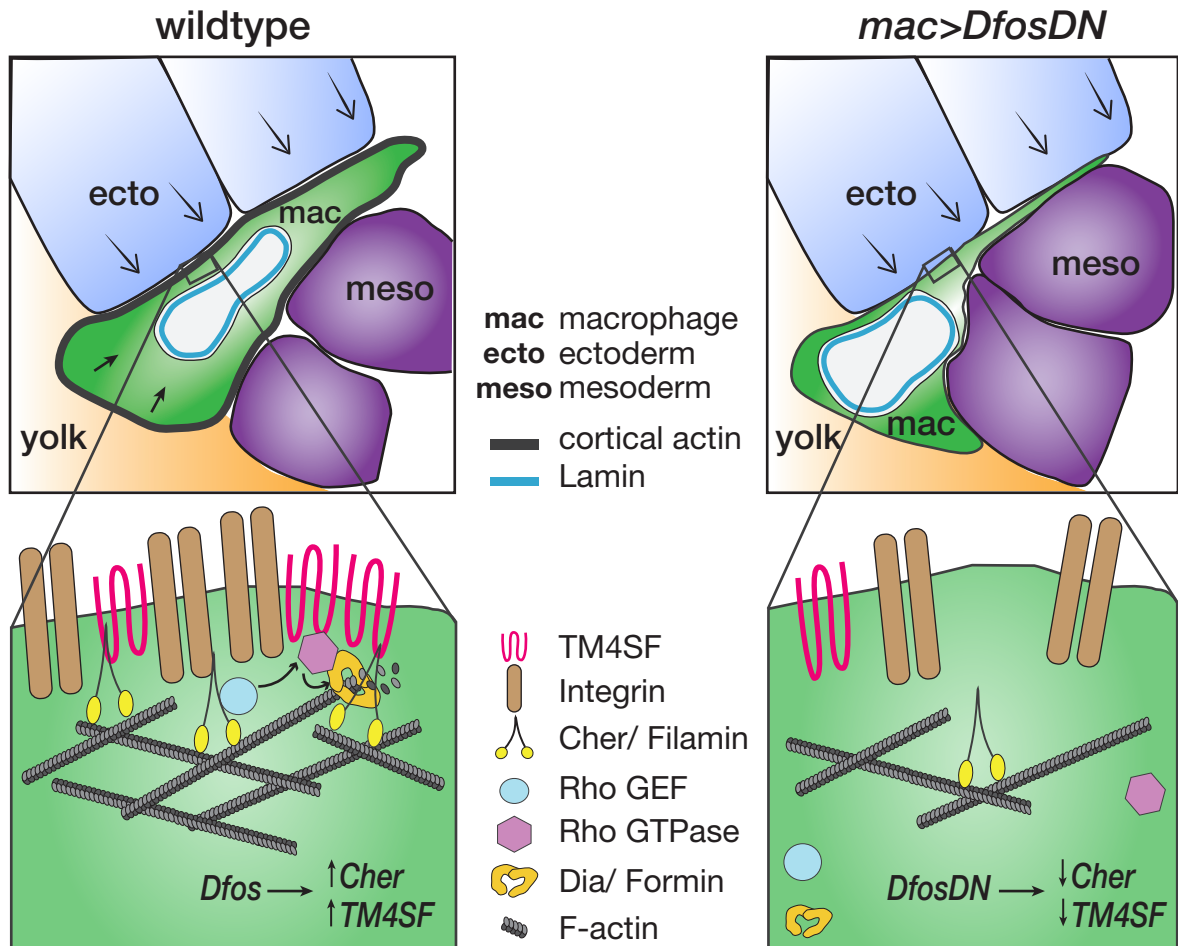

Source: https://www.biorxiv.org/content/10.1101/2020.09.18.301481v1.full.pdf
